# Supplementary material for: Genetic Diversity and Population Structure of Maize (Zea mays L.) Inbred Lines in Association with Phenotypic and Grain Qualitative Traits Using SSR Genotyping
Source: MDPI journal article supplement (doi:10.3390/plants13060823), 2024-03-13
Supplement: s1 [file s1]

Supplementary Figures

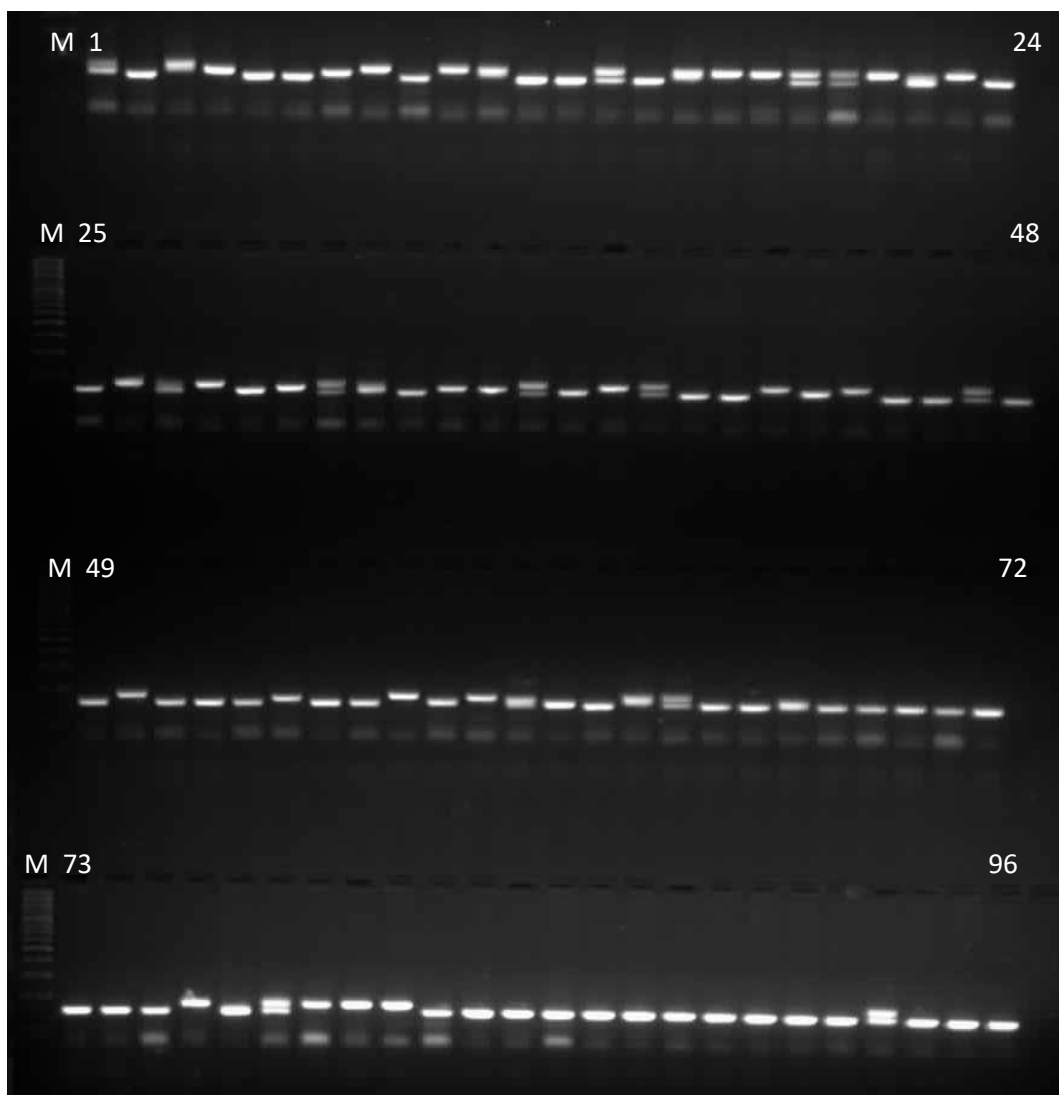

A

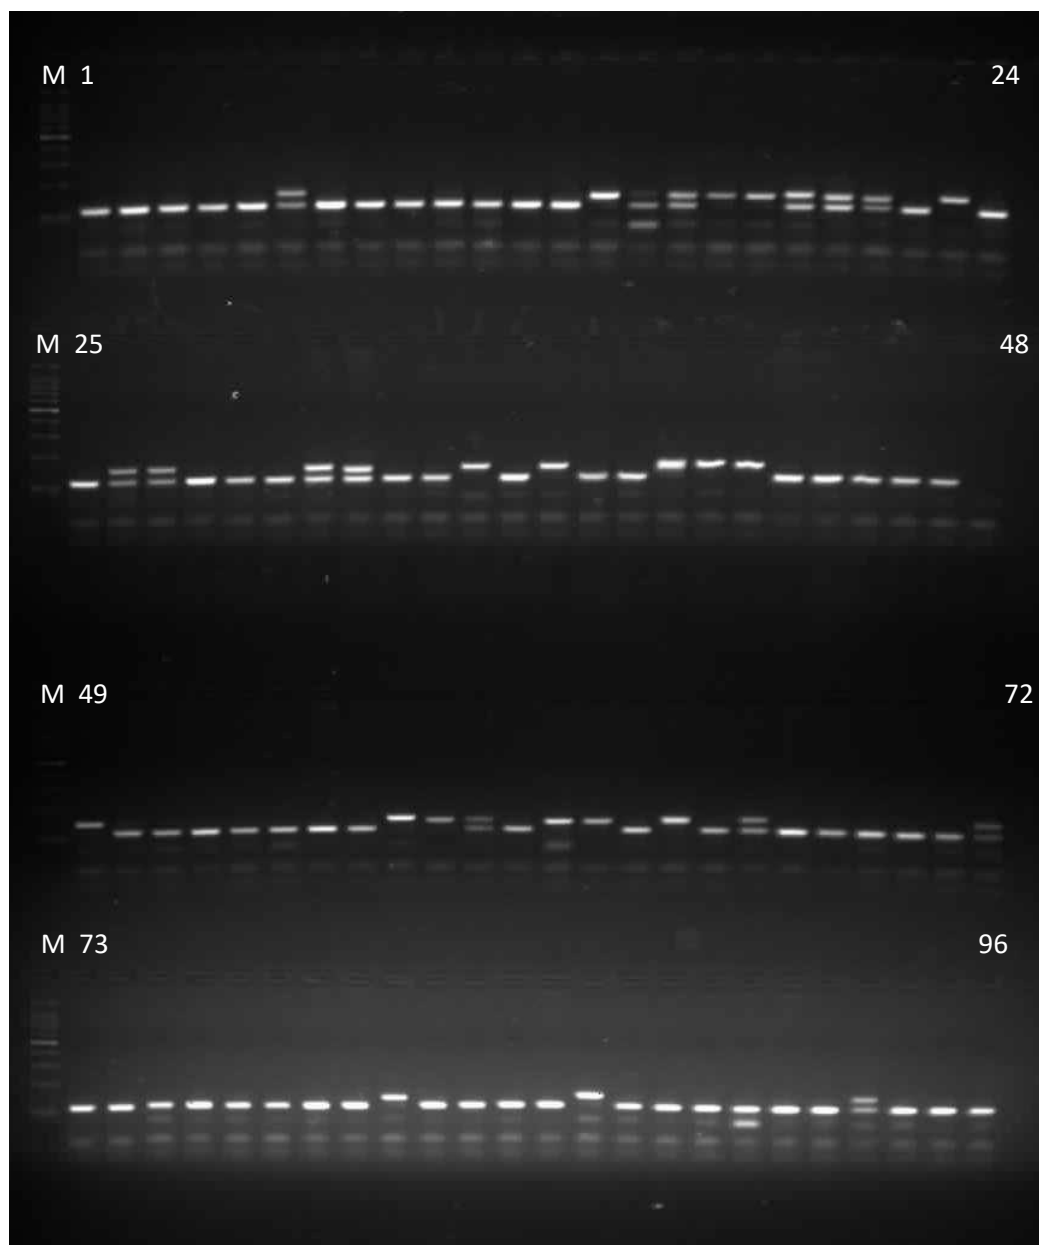

**B**

**Figure S1.** Agarose gel picture under UV trans-illuminant showing a model fingerprinting profile using SSRs - (A) *umc2101* and (B) *umc2252*.

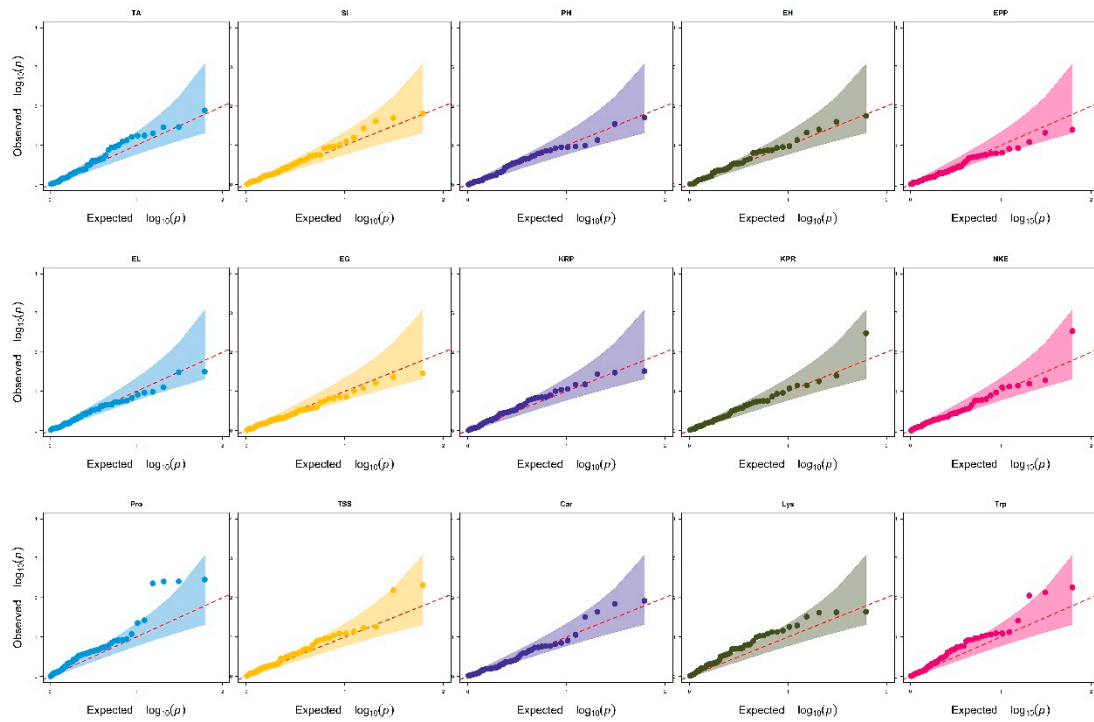

**Figure S2.** QQ plots for MLM of the different traits evaluated at Anand environment. TA: Days to 50% tasseling, SI: Days to 50% silking, PH: Plant height, EH: ear height, EPP: ears per plant, EL: ear length, EG: ear girth, KRP: kernel rows per ear, KPR: kernels per row, NKE: number of kernels per ear, Pro: protein content, TSS: total soluble sugar, Car: carotene content, Lys: lysine content, Trp: Tryptophan content.

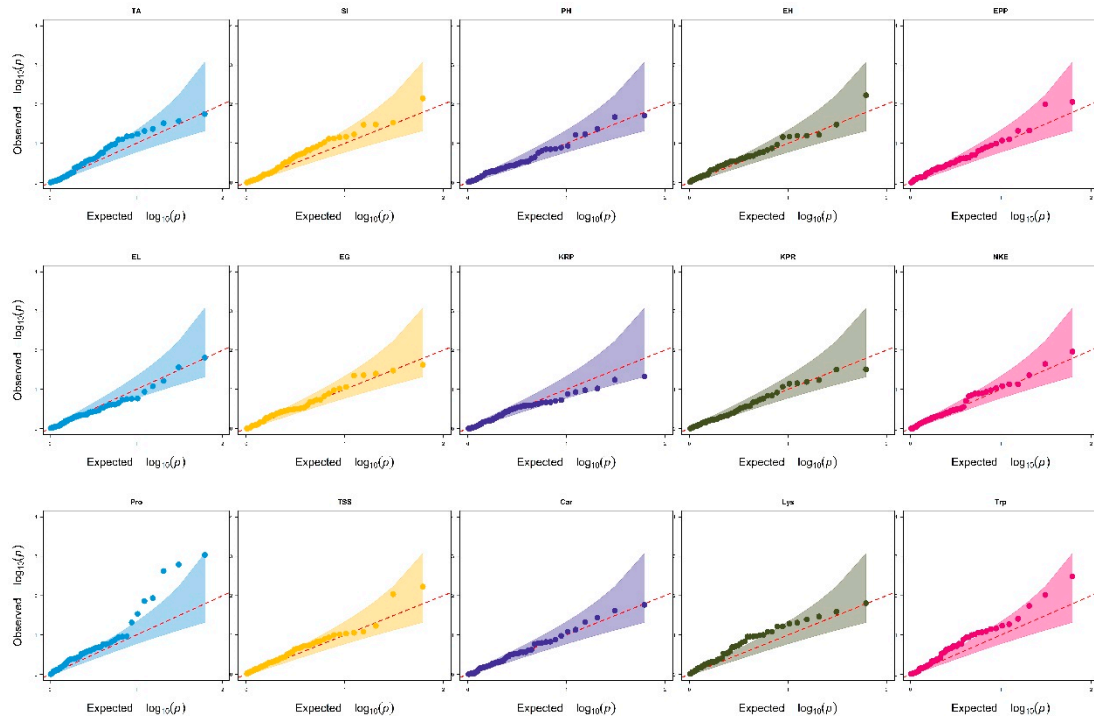

**Figure S3.** QQ plots for MLM of the different traits evaluated at Godhra environment. TA: Days to 50% tasseling, SI: Days to 50% silking, PH: Plant height, EH: ear height, EPP: ears per plant, EL: ear length, EG: ear girth, KRP: kernel rows per ear, KPR: kernels per row, NKE: number of kernels per ear, Pro: protein content, TSS: total soluble sugar, Car: carotene content, Lys: lysine content, Trp: Tryptophan content.

### Supplementary Tables

**Table S1.** Name and sources of studied maize inbred lines

| Sr. No. | Genotypes    | Source      | Sr. No. | Genotypes     | Source            |
|---------|--------------|-------------|---------|---------------|-------------------|
| 1       | I-07-14-1-2  | AAU, Godhra | 49      | GWQPM-68-4    | AAU, Godhra       |
| 2       | I-07-28-3-2  | AAU, Godhra | 50      | I-07-54-3-2   | AAU, Godhra       |
| 3       | I-07-29-1-3  | AAU, Godhra | 51      | I-07-7-3-2    | AAU, Godhra       |
| 4       | I-07-66-1-2  | AAU, Godhra | 52      | I-07-62-42-2  | AAU, Godhra       |
| 5       | I-07-66-2-3  | AAU, Godhra | 53      | 1820161/20-5  | IIMR,<br>Ludhiana |
| 6       | I-07-66-3-2  | AAU, Godhra | 54      | 1820164/20    | IIMR,<br>Ludhiana |
| 7       | I-07-66-4-1  | AAU, Godhra | 55      | 1820168/T1    | IIMR,<br>Ludhiana |
| 8       | I-07-56-4-3  | AAU, Godhra | 56      | 1820213/9-20  | IIMR,<br>Ludhiana |
| 9       | I-077-59-5   | AAU, Godhra | 57      | 1820215/C1-20 | IIMR,<br>Ludhiana |
| 10      | I-07-60-4-3  | AAU, Godhra | 58      | 1820228/T2    | IIMR,<br>Ludhiana |
| 11      | I-07-65-44-4 | AAU, Godhra | 59      | 11820211/T2   | IIMR,<br>Ludhiana |
| 12      | I-07-6-4-4   | AAU, Godhra | 60      | 1820211/T1    | IIMR,<br>Ludhiana |
| 13      | I-07-6-4-5   | AAU, Godhra | 61      | 1820200/C1-20 | IIMR,<br>Ludhiana |
| 14      | I-07-9-5     | AAU, Godhra | 62      | 1820198/C1-20 | IIMR,<br>Ludhiana |
| 15      | I-07-13-1-3  | AAU, Godhra | 63      | 1820197/T2    | IIMR,<br>Ludhiana |
| 16      | IL-14-28     | AAU, Godhra | 64      | 1820197/T1    | IIMR,<br>Ludhiana |
| 17      | IL-14-48     | AAU, Godhra | 65      | 1820167/C4-20 | IIMR,<br>Ludhiana |
| 18      | IL-14-60     | AAU, Godhra | 66      | 1820194/T1    | IIMR,<br>Ludhiana |
| 19      | IL-17-28     | AAU, Godhra | 67      | 1820192/4-20  | IIMR,<br>Ludhiana |
| 20      | IL-17-32     | AAU, Godhra | 68      | 1820229/T2    | IIMR,<br>Ludhiana |
| 21      | IL-17-34     | AAU, Godhra | 69      | I-07-33-04    | AAU, Godhra       |
| 22      | IL-17-44     | AAU, Godhra | 70      | I-07-34-3-1   | AAU, Godhra       |
| 23      | GYL-10       | AAU, Godhra | 71      | I-07-36-1-4   | AAU, Godhra       |
| 24      | PFSR5-3-5    | AAU, Godhra | 72      | I-07-36-2     | AAU, Godhra       |
| 25      | IL-15-39     | AAU, Godhra | 73      | I-07-37-6-1   | AAU, Godhra       |
| 26      | IL-15-11     | AAU, Godhra | 74      | I-07-40-4-2   | AAU, Godhra       |

|    |            |             |    |               |                   |
|----|------------|-------------|----|---------------|-------------------|
| 27 | IGI-1101   | AAU, Godhra | 75 | I-07-62-22-5  | AAU, Godhra       |
| 28 | IGI-1103   | AAU, Godhra | 76 | 1820162/T3    | IIMR,<br>Ludhiana |
| 29 | GYL-2      | AAU, Godhra | 77 | 1820166/T2    | IIMR,<br>Ludhiana |
| 30 | CML-307    | AAU, Godhra | 78 | 1820162/T2    | IIMR,<br>Ludhiana |
| 31 | IGI-1102   | AAU, Godhra | 79 | 1820162/T1    | IIMR,<br>Ludhiana |
| 32 | IGI-1104   | AAU, Godhra | 80 | 1820212/T2    | IIMR,<br>Ludhiana |
| 33 | LTP-1-1    | AAU, Godhra | 81 | 1820214/C1-20 | IIMR,<br>Ludhiana |
| 34 | LM-B-2     | AAU, Godhra | 82 | 1820228/T1    | IIMR,<br>Ludhiana |
| 35 | LM-5       | AAU, Godhra | 83 | 1820229/T1    | IIMR,<br>Ludhiana |
| 36 | H07R-1-3   | AAU, Godhra | 84 | 1820230/T1    | IIMR,<br>Ludhiana |
| 37 | GWQPM-5-3  | AAU, Godhra | 85 | 1820230/T2    | IIMR,<br>Ludhiana |
| 38 | GWQPM-11   | AAU, Godhra | 86 | 1820231/T1    | IIMR,<br>Ludhiana |
| 39 | GWQPM-17-2 | AAU, Godhra | 87 | 1820199/20-5  | IIMR,<br>Ludhiana |
| 40 | GWQPM-22-5 | AAU, Godhra | 88 | 1820194/T2    | IIMR,<br>Ludhiana |
| 41 | GWQPM-26-1 | AAU, Godhra | 89 | 1820196/T2    | IIMR,<br>Ludhiana |
| 42 | GWQPM-26-3 | AAU, Godhra | 90 | 1820193/T2    | IIMR,<br>Ludhiana |
| 43 | GWQPM-40-3 | AAU, Godhra | 91 | 1820195/20    | IIMR,<br>Ludhiana |
| 44 | GWQPM-40-5 | AAU, Godhra | 92 | 1820166/T1    | IIMR,<br>Ludhiana |
| 45 | GWQPM-46-2 | AAU, Godhra | 93 | 1820231/T3    | IIMR,<br>Ludhiana |
| 46 | GWQPM-47-1 | AAU, Godhra | 94 | 1820196/T1    | IIMR,<br>Ludhiana |
| 47 | GWQPM-55-2 | AAU, Godhra | 95 | 1820212/T1    | IIMR,<br>Ludhiana |
| 48 | GWQPM-67-2 | AAU, Godhra | 96 | I-07-62-3-2   | AAU, Godhra       |

---

**Table S2.** Meteorological data for the experimental field (E<sub>1</sub>: Anand, E<sub>2</sub>: Godhra) across the cropping season from November 2020 to March 2021.

| Month-Year and Standard week                                                            |      | Sun shine | Rain fall (mm) | Wind speed (kmph) | Temperature (°C) |      |       | Relative humidity (%) |         |       |
|-----------------------------------------------------------------------------------------|------|-----------|----------------|-------------------|------------------|------|-------|-----------------------|---------|-------|
| Month                                                                                   | Week | (hr/day)  |                |                   | Max.             | Min. | Mean  | Morning               | Evening | Mean  |
| Environment 1 (E <sub>1</sub> ): Anand (22.54°N, 72.98°E, 45.10 m above mean sea level) |      |           |                |                   |                  |      |       |                       |         |       |
| Nov-20                                                                                  | 44   | 9.1       | 0              | 2.4               | 34               | 17.6 | 25.8  | 80.4                  | 30.5    | 55.5  |
|                                                                                         | 45   | 9.3       | 0              | 1.9               | 33.4             | 15.8 | 24.6  | 80.1                  | 29.6    | 54.9  |
|                                                                                         | 46   | 8.5       | 0              | 2.6               | 32.6             | 19.1 | 25.9  | 78.9                  | 39.6    | 59.2  |
|                                                                                         | 47   | 8.7       | 0              | 3.1               | 30.4             | 15.2 | 22.8  | 80.9                  | 39.1    | 60    |
|                                                                                         | 48   | 8.4       | 0              | 4.3               | 30.4             | 17.6 | 24    | 76.6                  | 41.6    | 59.1  |
| Dec-20                                                                                  | 49   | 9.5       | 0              | 1.5               | 32.7             | 15.1 | 23.9  | 87.9                  | 36.1    | 62    |
|                                                                                         | 50   | 4.8       | 16.4           | 2.3               | 27.4             | 17.9 | 22.7  | 94.1                  | 62.4    | 78.3  |
|                                                                                         | 51   | 8.8       | 0              | 3.7               | 26.6             | 12.6 | 19.6  | 82                    | 44.3    | 63.1  |
|                                                                                         | 52   | 9.2       | 0              | 3.7               | 26.8             | 12.3 | 19.5  | 73.6                  | 36.5    | 55.1  |
| Jan-21                                                                                  | 1    | 6.7       | 0              | 3.3               | 25.5             | 12.7 | 19.1  | 89.4                  | 48.4    | 68.9  |
|                                                                                         | 2    | 8         | 0              | 4.6               | 26.6             | 13.8 | 20.2  | 79.7                  | 44.1    | 61.9  |
|                                                                                         | 3    | 8.9       | 0              | 3.4               | 24.6             | 9.7  | 17.2  | 87                    | 48.4    | 67.7  |
|                                                                                         | 4    | 9         | 0              | 3                 | 27.8             | 13   | 20.4  | 84.4                  | 43.7    | 64.1  |
|                                                                                         | 5    | 9.3       | 0              | 3.4               | 26.4             | 11   | 18.7  | 83.3                  | 37.3    | 60.3  |
| Feb-21                                                                                  | 6    | 10.1      | 0              | 4.3               | 27.6             | 12.1 | 19.9  | 75                    | 36      | 55.5  |
|                                                                                         | 7    | 9.4       | 0              | 2.8               | 32.3             | 15   | 23.6  | 79.3                  | 32.4    | 55.9  |
|                                                                                         | 8    | 9.5       | 0              | 2.9               | 32               | 15.2 | 23.6  | 80.6                  | 31.6    | 56.1  |
|                                                                                         | 9    | 9.3       | 0              | 2.4               | 33.2             | 16.5 | 24.9  | 82.9                  | 30.6    | 56.8  |
| Mar-21                                                                                  | 10   | 9.5       | 0              | 4.2               | 31.2             | 16.5 | 23.9  | 80                    | 31.3    | 55.6  |
|                                                                                         | 11   | 9.3       | 0              | 3.8               | 31               | 15.8 | 23.4  | 64.9                  | 20.4    | 42.6  |
|                                                                                         | 12   | 9.5       | 0              | 3.1               | 35.6             | 20.3 | 28    | 77.1                  | 31.9    | 54.5  |
|                                                                                         | 13   | 7.2       | 2              | 3.3               | 34.7             | 20.1 | 27.4  | 74.6                  | 33.6    | 54.1  |
| Environment 2 (E <sub>2</sub> ): Godhra (22.45°N, 40°E, 119.40 m above mean sea level)  |      |           |                |                   |                  |      |       |                       |         |       |
| Nov-20                                                                                  | 44   | 9.1       | 0              | 2.6               | 34.3             | 16.6 | 25.45 | 25.4                  | 61.4    | 43.4  |
|                                                                                         | 45   | 8.9       | 0              | 2.2               | 33.6             | 14.5 | 24.05 | 24.1                  | 63      | 43.55 |
|                                                                                         | 46   | 8.2       | 0              | 3.4               | 33.3             | 16.1 | 24.7  | 24.7                  | 65.3    | 45    |
|                                                                                         | 47   | 8.8       | 0              | 3.1               | 30.6             | 13.3 | 21.95 | 22                    | 71.1    | 46.55 |
|                                                                                         | 48   | 8.5       | 0              | 5.3               | 30.9             | 12.9 | 21.9  | 21.9                  | 61.7    | 41.8  |
| Dec-20                                                                                  | 49   | 9.3       | 0              | 1.9               | 33.8             | 13.6 | 23.7  | 23.7                  | 65.9    | 44.8  |
|                                                                                         | 50   | 4.9       | 10.5           | 2.4               | 27.6             | 12.9 | 20.25 | 20.3                  | 83.7    | 52    |
|                                                                                         | 51   | 8.3       | 0              | 4.2               | 26.9             | 11.4 | 19.15 | 19.1                  | 68.7    | 43.9  |
|                                                                                         | 52   | 9.1       | 0              | 4                 | 26.7             | 10.4 | 18.55 | 18.5                  | 76.4    | 47.45 |
| Jan-21                                                                                  | 1    | 6.8       | 0              | 5.3               | 24.1             | 12.1 | 18.1  | 77.9                  | 58.4    | 68.15 |
|                                                                                         | 2    | 6.7       | 0              | 4.6               | 26.3             | 11.2 | 18.75 | 57.3                  | 47.2    | 52.25 |
|                                                                                         | 3    | 6.2       | 0              | 3.5               | 24.1             | 7.9  | 16    | 76.8                  | 47.9    | 62.35 |
|                                                                                         | 4    | 7.9       | 0              | 3.6               | 28.4             | 11.3 | 19.85 | 80.8                  | 44.2    | 62.5  |
|                                                                                         | 5    | 7.2       | 0              | 3.9               | 26.3             | 10   | 18.15 | 67.8                  | 45.1    | 56.45 |
| Feb-21                                                                                  | 6    | 9.2       | 0              | 4.4               | 27.9             | 9.3  | 18.6  | 73.8                  | 49.5    | 61.65 |
|                                                                                         | 7    | 9.2       | 0              | 2.4               | 32.2             | 13.9 | 23.05 | 64.8                  | 33.9    | 49.35 |
|                                                                                         | 8    | 9.3       | 0              | 3.2               | 32.2             | 14.6 | 23.4  | 63.3                  | 35.6    | 49.45 |
|                                                                                         | 9    | 9         | 0              | 2.7               | 33.4             | 16.8 | 25.1  | 67.6                  | 30.2    | 48.9  |
| Mar-21                                                                                  | 10   | 9         | 0              | 4.6               | 30.4             | 15.8 | 23.1  | 69.6                  | 43.4    | 56.5  |
|                                                                                         | 11   | 9.4       | 0              | 4.6               | 30.6             | 13.6 | 22.1  | 47.8                  | 29.3    | 38.55 |

|    |     |    |     |      |      |       |      |      |       |
|----|-----|----|-----|------|------|-------|------|------|-------|
| 12 | 8.2 | 0  | 2.9 | 36.2 | 17.9 | 27.05 | 62.7 | 28.1 | 45.4  |
| 13 | 8   | 10 | 3.4 | 35   | 17.4 | 26.2  | 66.9 | 33.4 | 50.15 |

**Table S3.** List of polymorphic SSR markers and their primer details for PCR amplification.

| Sl. No. | SSR loci | Primer | Sequence 5'-3'           | Repeat motif <sup>1</sup> | T <sub>m</sub> |
|---------|----------|--------|--------------------------|---------------------------|----------------|
| 1       | umc2244  | F      | TGTGAGCCTGATTCCATTTTGAC  | (GGC) <sub>4</sub>        | 67.4           |
|         |          | R      | CATCGTGGGGACTAAAGCGAC    |                           | 55.7           |
| 2       | umc1756  | F      | ATCTCAGGTACTCTGCCTACGGG  | (CGG) <sub>4</sub>        | 67.3           |
|         |          | R      | AACAGAGGGTAGCTTGTGGCCT   |                           | 60.6           |
| 3       | umc1552  | F      | CTCGATAGCTCTGCTGCTTCCTC  | (GGA) <sub>7</sub>        | 67.6           |
|         |          | R      | CAACACCAGCCCTACCCAGA     |                           | 59.3           |
| 4       | umc1262  | F      | GTGAAGCTCTGCACCACGCT     | (GTC) <sub>4</sub>        | 68.9           |
|         |          | R      | ATCGTCCAAAGAAGAAGAGGGAGA |                           | 57.3           |
| 5       | umc2193  | F      | CCGAGGCATACGGACAATACC    | (TCC) <sub>6</sub>        | 69.3           |
|         |          | R      | GTAGGAGGACGGGTGCTGGT     |                           | 57.6           |
| 6       | umc1922  | F      | CTTTCCGCTGCTCTTCCTTTT    | (ATA) <sub>6</sub>        | 66.6           |
|         |          | R      | TTCCCTTGTTCCAGATCCTCAATA |                           | 55.6           |
| 7       | umc2125  | F      | CAAGGGTAAGGGCAAGATGGTAGT | (GAG) <sub>7</sub>        | 67.5           |
|         |          | R      | CTGAGGTCTACCTCGGCCATC    |                           | 59.0           |
| 8       | umc2252  | F      | CACTGCACTGCAAGGTACATACG  | (TCC) <sub>4</sub>        | 66.7           |
|         |          | R      | GTCTTTGACCCCTTCCTCTTCTTG |                           | 58.1           |
| 9       | umc1535  | F      | CAAGGCACCCACACACATACATA  | (AT) <sub>7</sub>         | 65.8           |
|         |          | R      | GGCAGAGAGATGAAAAAGAATGGA |                           | 57.2           |
| 10      | umc1831  | F      | TTTCGACTGCTAGTGTACTTGGGG | (AG) <sub>8</sub>         | 65.6           |
|         |          | R      | CTCTACATCTTCAGCGTCTCCACA |                           | 55.3           |
| 11      | umc1285  | F      | TAAATATACGGCCCCAAGAAAACC | (ACG) <sub>4</sub>        | 65.0           |
|         |          | R      | AAACTGGATATGGTTGGTTGGTTG |                           | 55.8           |
| 12      | umc2220  | F      | AATACAAGAAGCGAAAGGGGAAAG | (ACT) <sub>4</sub>        | 66.1           |
|         |          | R      | GCGTAGCAAACCAAAGAAGAAGAA |                           | 55.5           |
| 13      | umc1497  | F      | GAGGAAGACGGAGACGGCAC     | (GAC) <sub>4</sub>        | 68.5           |
|         |          | R      | TAGACGAGATCCTCTGAGGCAATG |                           | 57.8           |
| 14      | umc2380  | F      | ATTTCCAGAACAGACCGGAGAAG  | (GCT) <sub>5</sub>        | 65.9           |
|         |          | R      | ACATTGAGCCTAAGCGAGTCGT   |                           | 58.5           |
| 15      | umc2129  | F      | ACGTGGTCATCACTCACCGC     | (CGC) <sub>5</sub>        | 67.6           |
|         |          | R      | AAGGAGGAGCGTTCTCGTGG     |                           | 60.0           |
| 16      | umc2077  | F      | AAACTCACTGAACATGATCCTGGC | (AGC) <sub>4</sub>        | 66.1           |



|    |         |   |                            |                      |      |
|----|---------|---|----------------------------|----------------------|------|
|    |         | R | CTGGTTCGGATGCAAGTAGTCAG    |                      | 57.5 |
| 17 | umc1256 | F | CATCTCGACCTTTGACATTCTCCT   | (CAT) <sub>5</sub>   | 66.4 |
|    |         | R | AGAAGACGATGATGATGATGCAGA   |                      | 55.9 |
| 18 | umc1230 | F | GCGATTTCAACTATTTGTGGTAAAGG | (TAA) <sub>8</sub>   | 65.1 |
|    |         | R | GTACGACCGTTGAAACTGTTGTTTT  |                      | 56.3 |
| 19 | umc1704 | F | TTCACCGGGTAGTCCTTCTTACTG   | (AGG) <sub>4</sub>   | 66.2 |
|    |         | R | AAGTACGCTGTACGCAGGCAG      |                      | 59.7 |
| 20 | umc2214 | F | ACCCCCTGATTCTCTCTTACGTTT   | (CTT) <sub>4</sub>   | 66.4 |
|    |         | R | CTGGATGAGGAGGAAGAATACGAG   |                      | 56.3 |
| 21 | umc1696 | F | CTAGGGTTTAACCAACGGGGAG     | (GA) <sub>8</sub>    | 67.0 |
|    |         | R | TAAGGAGAGGGTCGATGAACACAT   |                      | 57.4 |
| 22 | umc2104 | F | CTGCTGGCAGTGGCAGTATTC      | (CGT) <sub>4</sub>   | 67.8 |
|    |         | R | TACTGCTACACCTTTGTCGTCACC   |                      | 58.6 |
| 23 | umc1746 | F | ACACGAGCATCCTACATCCTCCTA   | (CAC) <sub>4</sub>   | 66.9 |
|    |         | R | ACCTTGCCTGTCCTTCTTTCTCTT   |                      | 58.3 |
| 24 | umc1641 | F | CTCCCTTCGTCTCCCGACTC       | (TCGCC) <sub>4</sub> | 68.1 |
|    |         | R | CAGATCGGCTCAGCCACAAC       |                      | 58.6 |
| 25 | umc1010 | F | TCCATGTATGTGTGTGTGACGTG    | (GA) <sub>10</sub>   | 66.0 |
|    |         | R | AAACCAAACAGCCAAAAGGACA     |                      | 55.8 |
| 26 | umc1361 | F | GTGCTTCTTCCTGCCGTACTCC     | (TGT) <sub>6</sub>   | 68.1 |
|    |         | R | AAGAGCTACTTCAACAAGTCCGCC   |                      | 59.1 |
| 27 | umc1813 | F | CTGTACATGGATATGGCATTGGTG   | (CAG) <sub>8</sub>   | 66.0 |
|    |         | R | GCATATACACCACCTTGGACAACA   |                      | 57.2 |
| 28 | umc1136 | F | CTGCATACAGACATCCAACCAAAG   | (GCA) <sub>5</sub>   | 67.3 |
|    |         | R | CTCTCGTCTCATCACCTTTCCT     |                      | 56.1 |
| 29 | umc1578 | F | CGAGCAGCTAAGGTAGAGCAGCTA   | (GCG) <sub>4</sub>   | 67.9 |
|    |         | R | AAGCACTTCCAGTGGTACATGAGC   |                      | 59.2 |
| 30 | umc2277 | F | TAAGTGCAGAAACGGTGGTCAATA   | (ATA) <sub>6</sub>   | 66.7 |
|    |         | R | CTCTTCACGCTCAATAAACCCAGT   |                      | 56.4 |
| 31 | umc1273 | F | GTTGCTGCTGCTTCTTATATGCT    | (AAG) <sub>4</sub>   | 66.8 |
|    |         | R | AATTGGCGCAGGCTATAGACATT    |                      | 57.2 |
| 32 | umc1521 | F | GTCTCTCTTGCATGCCACTAGC     | (AGT) <sub>4</sub>   | 67.6 |
|    |         | R | GAGTCAGCTTCACCTCTCGATCTC   |                      | 58.4 |
| 33 | umc2174 | F | GTACGTACGCAGCCACTTGTGAG    | (CGA) <sub>4</sub>   | 65.6 |
|    |         | R | ACATAAATAAAACGTGTGCCGCAG   |                      | 59.9 |
| 34 | umc2276 | F | CTAGGTAGCCAGCTAGGTACGGGT   | (GGC) <sub>4</sub>   | 66.6 |
|    |         | R | AGTGGAGCTTCTTCATCCTACCG    |                      | 61.2 |
| 35 | umc1915 | F | AGACGAGTTAAACCTCCATCATGC   | (ACA) <sub>6</sub>   | 65.9 |
|    |         | R | CCTACCCCAACTTGCTTGAGACTA   |                      | 58.2 |
| 36 | umc2272 | F | GGAGGAAGCACAAGTACATGCAG    | (GCG) <sub>5</sub>   | 67.1 |
|    |         | R | CCTGAACTTGGTCTGCTTCTCTG    |                      | 57.5 |
| 37 | umc2050 | F | CTCCTGCTGTGATTCTAGGACGA    | (CGC) <sub>4</sub>   | 67.2 |
|    |         | R | CTGGATCTCGGCATGGTCTT       |                      | 56.9 |

|    |           |   |                          |                    |      |
|----|-----------|---|--------------------------|--------------------|------|
| 38 | umc1489   | F | TTAATAGCTACCCGCAACCAAGAA | (GCG) <sub>5</sub> | 65.7 |
|    |           | R | CTGAGCCACAGTACCTTGCTGTT  |                    | 59.3 |
| 39 | umc1690   | F | ACCTTAGTTACACAGGCACACGGT | (GCA) <sub>4</sub> | 67.6 |
|    |           | R | GGTGATGGGATTTTCGCATTATTA |                    | 53.6 |
| 40 | umc1404   | F | GTTGGCCTTCCTCTCTACCCC    | (CCG) <sub>4</sub> | 68.2 |
|    |           | R | CCAGTTCATCAGGTCATCAACCTT |                    | 57.0 |
| 41 | umc2258   | F | GAATAAGACCAGACAGCACCGAAC | (GTG) <sub>5</sub> | 65.4 |
|    |           | R | AAGATTGTATAAATGGCAGCCACG |                    | 57.6 |
| 42 | umc2259   | F | GGCTCGACTTCGAGGACACC     | (CCG) <sub>6</sub> | 68.5 |
|    |           | R | GAGGAGGAGAGGGACAGGGAAG   |                    | 60.0 |
| 43 | phi193225 | F | GCTCTTGGCGTGCTTCTT       | AAC                | 67.5 |
|    |           | R | GCGGGGAGGTGAAGAGCTA      |                    | 59.1 |
| 44 | umc1814   | F | AGAAGAAGAGGAGGTTCCATGACC | (CGA) <sub>4</sub> | 66.4 |
|    |           | R | GCATGTTTCCCTTTCACCTCC    |                    | 56.4 |
| 45 | umc1458   | F | CCAATAAACAATCATCTCCCCCT  | (GCT) <sub>5</sub> | 65.9 |
|    |           | R | TGCTATGCTATGTACAGGGACAGG |                    | 58.1 |
| 46 | umc1057   | F | GCCACGCTCAACTACGACAAC    | (CGG) <sub>6</sub> | 67.7 |
|    |           | R | GAACCCCTCCACGTAGCTCAG    |                    | 59.4 |
| 47 | umc2101   | F | CCCGGCTAGAGCTATAAAGCAAGT | (AG) <sub>7</sub>  | 67.3 |
|    |           | R | CTAGCTAGTTTGGTGCGTGGTGAT |                    | 59.0 |
| 48 | umc1780   | F | CTGTCCCCAGGTTGCTGTAGTAGT | (ACC) <sub>4</sub> | 68.1 |
|    |           | R | CATGATGTACCCGCAACAAATG   |                    | 54.8 |
| 49 | umc2377   | F | CCTTCAAACCAAATGTACAGCAGC | (GAC) <sub>4</sub> | 68.0 |
|    |           | R | CTCCTCAACGACAGCGTGTACC   |                    | 56.9 |
| 50 | umc2103   | F | CCTATCCATGCTTGAGGTGTCG   | (GCG) <sub>5</sub> | 67.1 |
|    |           | R | GTCCAGGAGGTTGTCGTCCA     |                    | 59.1 |
| 51 | umc1855   | F | CTCCGGGCAGGTCCTACTACAT   | (GCA) <sub>4</sub> | 68.5 |
|    |           | R | GATGAAGGAAAGAAGACACCATCG |                    | 55.6 |
| 52 | umc1669   | F | ACGAGGGCTTCTTCTCTGAGC    | (AGA) <sub>4</sub> | 67.3 |
|    |           | R | GTTTCCTTCTTCATGCGACGAC   |                    | 56.3 |
| 53 | umc1757   | F | TTTTCTGCAGGGATAACATTTGTG | (TCC) <sub>7</sub> | 64.5 |
|    |           | R | ATAGGAGGTGAGGTGAGGAGGAAG |                    | 59.2 |
| 54 | umc1758   | F | CTTCCTCCTCACCTCACCTCCTAT | (CTT) <sub>5</sub> | 67.7 |
|    |           | R | GGTAGCCAATCCTTCCTTCCTATG |                    | 56.9 |
| 55 | umc1228   | F | TCCTCAAGGACCTGCTCCAC     | (CAG) <sub>8</sub> | 67.5 |
|    |           | R | ACCTATACAGACGGAGACGGGG   |                    | 59.8 |
| 56 | umc1294   | F | GCCGTCAACGGGCTTAAACT     | (GAG) <sub>4</sub> | 67.9 |
|    |           | R | GCCTCCAGCTCTCTCGTCTCTT   |                    | 60.4 |
| 57 | umc1390   | F | CCTCGAAACAGATGCCTGAGTC   | (CCT) <sub>4</sub> | 67.1 |
|    |           | R | AAATGATCCCGAAGCCTGAGAC   |                    | 57.1 |
| 58 | umc2061   | F | GTCTGGAGAACTCCCTACCCATTC | (CTG) <sub>8</sub> | 67.2 |
|    |           | R | TAGCTTGAGAGACCGGAACAGC   |                    | 58.7 |
| 59 | umc2282   | F | GAGACGGACTACTCGTACCCACAC | (TGC) <sub>4</sub> | 68.1 |

|    |          |   |                            |                     |      |
|----|----------|---|----------------------------|---------------------|------|
|    |          | R | CTCTGGAGCCTTCTCTTCCTCCT    |                     | 60.2 |
| 60 | umc2038  | F | ACAGAAACCAATGCATGTGATGAG   | (GAC) <sub>4</sub>  | 65.5 |
|    |          | R | TGCATGGTTGCTTCAGCAGT       |                     | 57.8 |
| 61 | umc1620  | F | CCACCGAGTGACTAGTTGTGAGAG   | (TTC) <sub>4</sub>  | 67.1 |
|    |          | R | CCTTTCAATGTTTCATGTTCTCTTCC |                     | 54.3 |
| 62 | umc1847  | F | GCCCAAGGTAGATTTTTACTCTCCA  | (CGC) <sub>6</sub>  | 66.3 |
|    |          | R | AAGTCGTAGAGCTCGTCGTGATG    |                     | 58.4 |
| 63 | dupssr34 | F | TCAGTGCTTTCATTGTAACGA      | (TTG) <sub>14</sub> | 64.3 |
|    |          | R | ATAAACATCTTGCCAGCAAA       |                     | 50.4 |
| 64 | umc1775  | F | GAGGACAACGCTGCTATTCTCG     | (CGC) <sub>5</sub>  | 67.1 |
|    |          | R | GGAACTCCGTCAAAATCCCATC     |                     | 55.9 |
| 65 | umc2404  | F | ATGTATCATTGATTGGCAAACAGG   | (ATT) <sub>4</sub>  | 64.6 |
|    |          | R | ATCAGAGAGAAGGAAGGAAGAGGG   |                     | 57.4 |
| 66 | umc1313  | F | GCTGTCTGTGACCAAGTTTCCTCT   | (CTT) <sub>5</sub>  | 67.5 |
|    |          | R | TGAAGAACAGGGACGTGATGATAA   |                     | 55.8 |
| 67 | umc2384  | F | CTCTGGACTCGGTTCCCTCCTTAC   | (GCC) <sub>5</sub>  | 67.3 |
|    |          | R | CTCCTCTTTCCTGATCCTCTGCT    |                     | 57.9 |
| 68 | umc2137  | F | ACCACTGCAACCTAGAGCTGTACC   | (CGC) <sub>6</sub>  | 67.4 |
|    |          | R | CACTTGGGTTGTTCCACAGGAG     |                     | 60.5 |
| 69 | umc2200  | F | CTTCCTCCTCCTCGTCTCTTTCAT   | (CGC) <sub>4</sub>  | 66.8 |
|    |          | R | GGGGCCAAATCTGAATCTTCC      |                     | 57.7 |
| 70 | umc1623  | F | TCCAGCAGAACACCAACCTATTAGA  | (CGC) <sub>4</sub>  | 66.1 |
|    |          | R | GAGACCAGCAGGTAGTTCTTGGAA   |                     | 58.4 |
| 71 | umc2139  | F | ATAAGGAACATCCCCACCTGTTTT   | (GCC) <sub>4</sub>  | 68.2 |
|    |          | R | GGTGTGCTGGGTTCTTGTGG       |                     | 56.5 |
| 72 | umc1238  | F | AAACCAGTACACAGGAGGTTTTGC   | (TTC) <sub>5</sub>  | 65.5 |
|    |          | R | CTTTGGTGAAAGCTGCAATGTAGA   |                     | 56.2 |
| 73 | umc2360  | F | TAGCAGCTAGCTTCAGTCACAGGC   | (GCC) <sub>4</sub>  | 67.2 |
|    |          | R | CAGATCGGACTACTGGTGGCTAAG   |                     | 60.7 |
| 74 | umc2400  | F | TTTGGTGAAAGTGAAACCAAAGGT   | (AGA) <sub>4</sub>  | 65.4 |
|    |          | R | CTAGCTAGCTTCCTTCCTCCTCG    |                     | 58.2 |
| 75 | umc1761  | F | GGCTTGTAGTTGGAGTGGTCGTAG   | (GCA) <sub>5</sub>  | 67.4 |
|    |          | R | AGCAGCTTCAGAGGAGGAAGAAG    |                     | 58.5 |
| 76 | umc2063  | F | GGA CTGAAGCGTGGAATGTTCT    | (AGG) <sub>4</sub>  | 67.2 |
|    |          | R | ATCGCAATCTGAGACCACTTGTT    |                     | 56.7 |
| 77 | umc2295  | F | CTGCTTCCA ACTTCCGTTGC      | (GGA) <sub>5</sub>  | 67.3 |
|    |          | R | CACCTTGAAGACGTAGTCCACCTT   |                     | 57.0 |
| 78 | umc2298  | F | ATCCACTCCCAAGTCCCAACAC     | (GCG) <sub>4</sub>  | 67.0 |
|    |          | R | CTTCTTCCGGTTCTTCTTCAGGC    |                     | 59.2 |
| 79 | umc1429  | F | GGGCCCTGTAAATCCTCATCTG     | (TGC) <sub>5</sub>  | 67.1 |
|    |          | R | TCCTCCTTCTCTCATGTTTCTCG    |                     | 56.2 |
| 80 | umc2388  | F | GTGAGGGACTGGAAGGAGGTGTA    | (GCC) <sub>4</sub>  | 67.3 |
|    |          | R | CTTCCATCGCTTTCGCGTACT      |                     | 59.9 |

|     |         |   |                           |                     |      |
|-----|---------|---|---------------------------|---------------------|------|
| 81  | umc1597 | F | ACAACCGCTGCGTAAACGAAT     | (CCT) <sub>4</sub>  | 66.9 |
|     |         | R | AGAGATTAGGCGAGCGAGGG      |                     | 58.7 |
| 82  | umc1564 | F | AAGAAGAAAGAGAAGAAGCACGGG  | (CAG) <sub>5</sub>  | 65.9 |
|     |         | R | GGACAGCTCGTATTATAACCTGCG  |                     | 57.3 |
| 83  | umc2296 | F | TGCAGTGA CTTGAGACCATACACA | (AGT) <sub>4</sub>  | 66.7 |
|     |         | R | GCTATACGCGTGCCAAGCTAAATA  |                     | 58.1 |
| 84  | umc1373 | F | ATGATGATGACGACGACGAAGAT   | (AAG) <sub>4</sub>  | 65.6 |
|     |         | R | CGTCAGGTCTGTTGCATATCTGTT  |                     | 57.1 |
| 85  | umc1110 | F | TTACACCAAGGTCCGAAACAAGAT  | (AGC) <sub>7</sub>  | 65.7 |
|     |         | R | TCTTGGAAGGCAAGACTCTACCTG  |                     | 58.2 |
| 86  | umc2373 | F | ACCCAAGTGAGGTGAAGTGAAGC   | (GCT) <sub>4</sub>  | 67.3 |
|     |         | R | TATGGTACAGGCACAGCAGCAGTA  |                     | 59.3 |
| 87  | umc1482 | F | GAACAAAGAATCACAACACGATGC  | (AGC) <sub>5</sub>  | 65.5 |
|     |         | R | CAGGTTCTGAGGAAAGCAAGGTT   |                     | 57.4 |
| 88  | umc2046 | F | CGTTCACCTCTGCCTTTTGTC     | (CCG) <sub>4</sub>  | 67.1 |
|     |         | R | GAAGGATCCGACGAAGACCTG     |                     | 57.8 |
| 89  | umc1171 | F | ACGTACTACAGATAATGGGCGACG  | (GTT) <sub>4</sub>  | 66.3 |
|     |         | R | CGCCGTACCCATGAGTATAATGTAA |                     | 56.3 |
| 90  | umc1629 | F | GCTCCAAGTTCGTCGTCGTC      | (GAA) <sub>5</sub>  | 67.6 |
|     |         | R | CTCACGACCTTCTTCTTGACAC    |                     | 58.0 |
| 91  | umc1060 | F | ACAGGATTTGAGCTTCTGGACATT  | (CGG) <sub>5</sub>  | 65.9 |
|     |         | R | GGCCTCTCCTTCATCCTATTCAA   |                     | 56.2 |
| 92  | umc1752 | F | ATCCTCCTCCATATTCTATCGCGT  | (CGG) <sub>5</sub>  | 67.4 |
|     |         | R | GAAACAGAGCAGGAACCGGAG     |                     | 57.1 |
| 93  | umc2201 | F | AGGGAAGGGGAAAAGCAGTTAAG   | (GCG) <sub>5</sub>  | 66.2 |
|     |         | R | TAGAACGGCGAACAGAAGCAG     |                     | 57.3 |
| 94  | umc1941 | F | ACGACGAGACTCTGTTCTGGTTCT  | (CTG) <sub>10</sub> | 67.0 |
|     |         | R | AGGAGGATTACGTCAATCTGTTTCG |                     | 56.4 |
| 95  | phi087  | F | GAGAGGAGGTGTTGTTTGACACAC  | ACC                 | 66.8 |
|     |         | R | ACAACCGGACAAGTCAGCAGATTG  |                     | 59.6 |
| 96  | umc2143 | F | ACACACAACAGAGCCTTTTGTTCA  | (TTC) <sub>4</sub>  | 65.5 |
|     |         | R | AAGAAAAGGACACCAAACCAAACA  |                     | 57.4 |
| 97  | umc2136 | F | CCAGATGCGGAAGTAGACGG      | (CCT) <sub>8</sub>  | 67.4 |
|     |         | R | GATTTCGGAGGTGATCTGACCTGT  |                     | 57.6 |
| 98  | umc2307 | F | GTCGACATCGTCTTCCCCAAG     | (CAG) <sub>4</sub>  | 68.2 |
|     |         | R | GTAGGAAGCCACGTACGGCTC     |                     | 57.6 |
| 99  | umc1153 | F | CAGCATCTATAGCTTGCTTGCATT  | (TCA) <sub>4</sub>  | 66.1 |
|     |         | R | TGGGTTTTGTTTGTTTGTTTGTTG  |                     | 53.7 |
| 100 | umc1290 | F | CTGCTCACGCTCATCCTCCT      | (GCG) <sub>6</sub>  | 68.4 |
|     |         | R | AGAGATTCATCAGAGTGGCGATG   |                     | 56.5 |
| 101 | umc2189 | F | CGTAAGTACAGTACACCAATGGGC  | (CAG) <sub>4</sub>  | 66.7 |
|     |         | R | ACACCGACTACAAGCCTCTCAACT  |                     | 59.8 |
| 102 | umc1737 | F | ATGCTTCTCTTCAGAAGCCATCC   | (AGA) <sub>7</sub>  | 66.2 |

|     |          |   |                            |                    |      |
|-----|----------|---|----------------------------|--------------------|------|
|     |          | R | TAGCTAGGTAGTGATGTGCGTGCT   |                    | 59.6 |
| 103 | umc1534  | F | GACCCCAAATCTCTCCTTCCTC     | (AAG) <sub>5</sub> | 66.9 |
|     |          | R | TAGCTAAGCTTGTGCTTGCTCG     |                    | 57.5 |
| 104 | umc2100  | F | AAAGGCATTATGCTCACGTTGATT   | (ATT) <sub>4</sub> | 65.4 |
|     |          | R | TGACGTGCAAACAACCTTCATTAC   |                    | 56.2 |
| 105 | umc2029  | F | AGAGCAATCCTGTTCCAAATGAAG   | (AGA) <sub>5</sub> | 65.3 |
|     |          | R | CTTAAACCCAATCGAACTCGAACA   |                    | 55.3 |
| 106 | umc2240  | F | CGCCTTTGTAACCCAGACTCATT    | (AC) <sub>6</sub>  | 65.7 |
|     |          | R | CGGATGTTGCCAAGTACATCATATC  |                    | 56.9 |
| 107 | umc1838  | F | CTTCACGAAGGTCTGAAACTTAGG   | (TA) <sub>8</sub>  | 65.6 |
|     |          | R | GTGCATAAATAAAAAGGGGGAGAGT  |                    | 55.0 |
| 108 | umc1848  | F | TCAGCTTTATCTCTACCCATTGCTTT | (AG) <sub>8</sub>  | 65.3 |
|     |          | R | TCCATCATCTCCCTCCAGACTTTA   |                    | 56.8 |
| 109 | umc2223  | F | TTTTGGGACTGAAGAAGAAGATCG   | (GCG) <sub>4</sub> | 67.8 |
|     |          | R | ACTTCTGCAGAGCGAGCAGG       |                    | 55.0 |
| 110 | umc1122  | F | CACAACTCCATCAGAGGACAGAGA   | (CGT) <sub>7</sub> | 67.0 |
|     |          | R | CTGCTACGACATACGCAAGGC      |                    | 58.3 |
| 111 | umc1942  | F | GAGCCCAAGATCATCACGGT       |                    | 66.9 |
|     |          | R | TCGTCCTCATCTTCCTCCTCTTC    |                    | 58.4 |
| 112 | umc2151  | F | ATATGTGGTATTTTCTGCAGGCGT   | (CAG) <sub>4</sub> | 66.0 |
|     |          | R | AAAATCCTATACAGAAAACGGGCG   |                    | 55.5 |
| 113 | umc2083  | F | GATGCTCAAGGAGCAGCGAC       | (CGG) <sub>7</sub> | 67.9 |
|     |          | R | CAGGTGGTACGCCATGAACC       |                    | 58.4 |
| 114 | umc1446  | F | GCGCTGCTGCTTCTTAAATTATCT   | (TAA) <sub>7</sub> | 66.1 |
|     |          | R | GATGAGACCACCTACAAGTTCGCT   |                    | 58.5 |
| 115 | umc1558  | F | GAGGTTGAGAGCAGCATATGAAAAA  | (AG) <sub>7</sub>  | 65.8 |
|     |          | R | AAGGTGGAGAACCAGAAGAGGAAG   |                    | 58.2 |
| 116 | umc1770  | F | GAGGGATCATGGCTCTCTTCC      | (GGC) <sub>4</sub> | 67.1 |
|     |          | R | GTCCATCATCAGCCTGTCACC      |                    | 57.8 |
| 117 | umc1849  | F | TCCTTGTTGAAGATTTTATTCTGCT  | (TA) <sub>8</sub>  | 63.9 |
|     |          | R | GGCTTTAAGTGATGCTCAAACGTA   |                    | 55.6 |
| 118 | umc1452  | F | GATCCTAGCCTTGAAGGGGAACT    | (GCC) <sub>4</sub> | 67.5 |
|     |          | R | AAGAGGAACCATCTGCTATCGTG    |                    | 56.7 |
| 119 | umc1812  | F | TACAAGGAAGGCAAGTTCATCCTC   | (ACC) <sub>6</sub> | 65.7 |
|     |          | R | ATGCAGGTGACATTCATCATCATC   |                    | 55.5 |
| 120 | bnlg1803 | F | GTATGCGTCGCTAGTCGTGA       | (AG) <sub>15</sub> | 67.1 |
|     |          | R | TGTTGTCTATTGGCAACCGA       |                    | 54.4 |
| 121 | umc1353  | F | AGACAGGATCATCGAAAACACACA   | (AAC) <sub>4</sub> | 65.7 |
|     |          | R | ACCTCAGCCTCCTCGTCAACTACT   |                    | 61.1 |
| 122 | umc2191  | F | CAGGTGGTGAGAGTTTCACAT      | (CTC) <sub>6</sub> | 67.4 |
|     |          | R | AAGGTGGAGGATGACTCCAAGAT    |                    | 57.6 |
| 123 | umc2204  | F | AGCTGCTGAAGATGAAGGACAGG    | (GCG) <sub>6</sub> | 67.2 |
|     |          | R | TCACCGTCGAGAACGACGAC       |                    | 59.0 |

|     |         |   |                           |                    |      |
|-----|---------|---|---------------------------|--------------------|------|
| 124 | umc2226 | F | TGCTGTGCAGTTCTTGCTTCTTAC  | (TGG) <sub>6</sub> | 66.5 |
|     |         | R | AGCTTCACGCTCTTCTAGACCAAA  |                    | 57.8 |
| 125 | umc1104 | F | CAACAATTCCAATCATGGCACTAA  | (GAT)              | 57.6 |
|     |         | R | GTAACCTCTGGTGAAGTCAGAGGGC |                    | 64.4 |
| 126 | umc1257 | F | CAACGGAAGTGGCTGTAGAGTTTT  | (CAC) <sub>4</sub> | 61.0 |
|     |         | R | ACAGAGCATGTCAGGTATTTGCAG  |                    | 61.0 |
| 127 | umc1273 | F | GTTGCTGCTGCTTCTTATATGCT   | (AAG) <sub>4</sub> | 61.0 |
|     |         | R | AATTGGCGCAGGCTATAGACATTT  |                    | 59.3 |
| 128 | umc1303 | F | CTTGGTAGCTTCGTATTCGACGAG  | (CCG) <sub>4</sub> | 62.7 |
|     |         | R | ATCCTAGGAAAGCAGGGAGGG     |                    | 61.8 |
| 129 | umc1312 | F | AAAGTTACTGCTGCCAAAGCTGTC  | (CAC) <sub>4</sub> | 61.0 |
|     |         | R | AGATCGAGCGGTGGATATGGT     |                    | 59.8 |
| 130 | umc1360 | F | GCTAGTTGAGTTCGACACCAGGTT  | (ACA) <sub>4</sub> | 62.7 |
|     |         | R | TGACTGTGACTGTGACTATGACCG  |                    | 62.7 |
| 131 | umc1367 | F | TGGACGATCTGCTTCTTCAGG     | (CGA) <sub>6</sub> | 59.8 |
|     |         | R | GAAGGCTTCTTCCTCGAGTAGGTC  |                    | 64.4 |
| 132 | umc1480 | F | AATGAAGGTGGATGTGCTGCTACT  | (GAA) <sub>4</sub> | 61.0 |
|     |         | R | CTTCCCCATCTCCTCTTGAAGATT  |                    | 61.0 |
| 133 | umc1521 | F | GTCTCTCTCTTGCATGCCACTAGC  | (AGT) <sub>4</sub> | 64.4 |
|     |         | R | GAGTCAGCTTCACCTCTCGATCTC  |                    | 64.4 |
| 134 | umc1714 | F | CAAGGGCTCTTGCTCTTGAAGTAA  | (AGG) <sub>8</sub> | 61.0 |
|     |         | R | CGACGACCTTAATTGTGTTTCCTTT |                    | 59.3 |
| 135 | umc1796 | F | CGCTGAGGCTTAAGATGGTGTT    | (CCT) <sub>5</sub> | 60.3 |
|     |         | R | AACGCCTTTACGAGCACGAAC     |                    | 59.8 |
| 136 | umc2392 | F | CAGAGACCTCGACTTCGACCAC    | (GGC) <sub>5</sub> | 64.2 |
|     |         | R | CTTCTGCTTCTGCTCGACCTTCT   |                    | 66.1 |

<sup>1</sup> Based on the information in MaizeGDB site

**Table S4.** Mean values of the studied phenotypic and grain quality traits of 96 maize lines in two environments - Anand and Godhra.

| Environment | Maize lines | TA    | SI   | PH      | EH    | EPP  | EL    | EG    | KRP    | KPR   | NKE    | Pro   | TSS   | Car    | LYS  | TRP   |
|-------------|-------------|-------|------|---------|-------|------|-------|-------|--------|-------|--------|-------|-------|--------|------|-------|
| Anand       | 1           | 75.00 | 81   | 132.1   | 47.21 | 1.17 | 14.05 | 11.50 | 13.665 | 17.84 | 243.45 | 8.43  | 0.43  | 0.65   | 1.19 | 0.165 |
| Anand       | 2           | 76.50 | 83   | 90.125  | 35.26 | 1.65 | 13.80 | 13.25 | 14.25  | 18.13 | 258.17 | 6.59  | 0.44  | 1.605  | 1.55 | 0.28  |
| Anand       | 3           | 77.50 | 84   | 160.15  | 69.93 | 2.00 | 14.00 | 13.75 | 14.665 | 26.92 | 393.72 | 8.20  | 0.465 | 0.96   | 1.11 | 0.275 |
| Anand       | 4           | 73.00 | 79.5 | 105.35  | 39.75 | 1.10 | 11.84 | 13.62 | 14.5   | 21.17 | 311.67 | 8.43  | 0.5   | 0.49   | 1.31 | 0.19  |
| Anand       | 5           | 71.00 | 75.5 | 132     | 51.67 | 1.00 | 14.79 | 11.26 | 12.8   | 29.32 | 375.10 | 9.29  | 0.465 | 0.39   | 1.48 | 0.245 |
| Anand       | 6           | 72.00 | 76.5 | 90.615  | 41.45 | 1.42 | 12.13 | 10.20 | 11.665 | 14.67 | 171.89 | 9.10  | 0.26  | 2.19   | 1.13 | 0.2   |
| Anand       | 7           | 71.50 | 78   | 157.65  | 74.88 | 1.66 | 11.59 | 14.30 | 14.165 | 25.00 | 349.50 | 9.91  | 0.305 | 3.32   | 1.38 | 0.145 |
| Anand       | 8           | 72.00 | 76   | 142.55  | 59.57 | 1.34 | 14.34 | 9.77  | 13.665 | 32.16 | 440.35 | 8.17  | 0.39  | 2.245  | 2.00 | 0.205 |
| Anand       | 9           | 63.50 | 71.5 | 119.2   | 40.16 | 1.17 | 16.28 | 10.75 | 14     | 31.16 | 437.22 | 8.98  | 0.405 | 10.31  | 1.34 | 0.12  |
| Anand       | 10          | 68.50 | 73.5 | 85.15   | 23.42 | 1.83 | 10.75 | 12.74 | 14.5   | 20.83 | 301.93 | 10.75 | 0.42  | 13.86  | 1.10 | 0.17  |
| Anand       | 11          | 75.00 | 82   | 66.555  | 30.39 | 1.50 | 9.12  | 11.95 | 14.2   | 22.08 | 313.13 | 11.35 | 0.33  | 6.33   | 1.28 | 0.3   |
| Anand       | 12          | 67.50 | 74   | 121.1   | 47.81 | 1.50 | 14.71 | 14.44 | 15     | 28.59 | 429.67 | 11.58 | 0.24  | 9.2    | 1.30 | 0.235 |
| Anand       | 13          | 72.00 | 78.5 | 96.92   | 35.67 | 1.84 | 15.00 | 10.25 | 13     | 30.55 | 398.10 | 11.34 | 0.405 | 10.31  | 1.35 | 0.295 |
| Anand       | 14          | 69.50 | 76   | 121.5   | 43.24 | 1.35 | 13.25 | 12.84 | 14.5   | 27.00 | 391.00 | 8.30  | 0.7   | 5.285  | 1.89 | 0.39  |
| Anand       | 15          | 70.00 | 77.5 | 119.1   | 52.24 | 2.00 | 12.95 | 12.99 | 14.815 | 23.00 | 339.93 | 9.53  | 0.7   | 5.85   | 1.60 | 0.295 |
| Anand       | 16          | 63.00 | 71   | 150.3   | 61.08 | 1.66 | 15.00 | 12.03 | 14.49  | 29.97 | 435.42 | 9.41  | 0.565 | 10.1   | 1.46 | 0.31  |
| Anand       | 17          | 72.00 | 78.5 | 112.45  | 50.79 | 1.17 | 9.75  | 9.76  | 11.75  | 19.15 | 225.13 | 8.63  | 0.555 | 3.925  | 1.99 | 0.55  |
| Anand       | 18          | 72.00 | 79   | 149.85  | 64.44 | 1.50 | 15.75 | 11.79 | 15     | 28.34 | 425.12 | 8.97  | 0.43  | 13.185 | 1.43 | 0.345 |
| Anand       | 19          | 71.50 | 79.5 | 108.75  | 46.82 | 2.00 | 13.34 | 11.83 | 14     | 30.34 | 424.45 | 9.83  | 0.46  | 5.3    | 1.12 | 0.305 |
| Anand       | 20          | 70.50 | 76.5 | 84.75   | 34.48 | 1.00 | 11.81 | 12.02 | 12.5   | 17.67 | 220.48 | 10.51 | 0.315 | 6.745  | 1.44 | 0.35  |
| Anand       | 21          | 73.00 | 78.5 | 131.725 | 46.38 | 1.50 | 12.67 | 11.12 | 14.185 | 21.84 | 303.91 | 10.02 | 0.425 | 5.845  | 1.15 | 0.195 |
| Anand       | 22          | 76.50 | 81   | 131.325 | 53.35 | 1.50 | 15.17 | 11.55 | 15.165 | 29.33 | 445.76 | 9.63  | 0.54  | 9.49   | 1.62 | 0.355 |
| Anand       | 23          | 67.50 | 73.5 | 108.75  | 45.41 | 1.20 | 14.59 | 11.30 | 14.675 | 29.67 | 433.29 | 10.50 | 0.61  | 5.83   | 1.63 | 0.295 |
| Anand       | 24          | 75.00 | 80.5 | 140.115 | 59.34 | 1.60 | 16.42 | 11.74 | 13.255 | 33.50 | 445.25 | 10.99 | 0.3   | 5.895  | 2.09 | 0.51  |
| Anand       | 25          | 71.50 | 77.5 | 123.425 | 54.19 | 1.00 | 11.29 | 10.58 | 13.695 | 26.34 | 357.98 | 10.38 | 0.34  | 8.29   | 1.80 | 0.325 |

|       |    |       |       |         |       |      |       |       |        |       |        |       |       |        |      |       |
|-------|----|-------|-------|---------|-------|------|-------|-------|--------|-------|--------|-------|-------|--------|------|-------|
| Anand | 26 | 70.00 | 76.5  | 147.9   | 46.68 | 2.00 | 18.42 | 11.29 | 13.235 | 34.00 | 448.92 | 8.54  | 0.38  | 5.74   | 2.64 | 0.635 |
| Anand | 27 | 77.00 | 83    | 111.45  | 50.19 | 1.33 | 15.75 | 8.80  | 10.265 | 24.08 | 247.71 | 9.96  | 0.41  | 7.92   | 1.52 | 0.305 |
| Anand | 28 | 76.50 | 82    | 149.55  | 56.13 | 1.83 | 16.95 | 11.96 | 14.165 | 24.40 | 344.92 | 10.46 | 0.33  | 1.85   | 1.38 | 0.28  |
| Anand | 29 | 70.00 | 76    | 139.525 | 44.93 | 2.00 | 9.83  | 11.50 | 14.34  | 21.50 | 309.11 | 9.31  | 0.325 | 11.35  | 1.70 | 0.345 |
| Anand | 30 | 65.50 | 71    | 97.55   | 27.70 | 2.00 | 9.95  | 8.07  | 9.135  | 14.98 | 136.67 | 8.16  | 0.86  | 10.33  | 1.46 | 0.305 |
| Anand | 31 | 63.50 | 70    | 123.99  | 47.06 | 1.00 | 12.12 | 10.45 | 13.165 | 19.34 | 254.28 | 7.50  | 0.055 | 1.425  | 1.66 | 0.3   |
| Anand | 32 | 65.50 | 73.5  | 134.485 | 47.93 | 1.33 | 13.06 | 12.08 | 14     | 28.00 | 392.00 | 8.60  | 0.43  | 0.575  | 1.61 | 0.385 |
| Anand | 33 | 71.50 | 76.5  | 122.4   | 44.77 | 1.00 | 12.16 | 12.64 | 15.775 | 29.80 | 471.24 | 8.88  | 0.42  | 4.33   | 1.65 | 0.395 |
| Anand | 34 | 74.00 | 81    | 126.4   | 38.47 | 1.50 | 8.95  | 11.75 | 16     | 17.50 | 270.56 | 8.74  | 0.48  | 14.805 | 1.83 | 0.395 |
| Anand | 35 | 72.50 | 78.5  | 129.85  | 50.80 | 1.66 | 13.20 | 8.65  | 11.65  | 32.10 | 374.28 | 10.92 | 0.63  | 9.26   | 2.53 | 0.63  |
| Anand | 36 | 74.00 | 81    | 117.9   | 57.40 | 1.50 | 12.42 | 9.57  | 13.17  | 22.00 | 290.05 | 8.65  | 0.515 | 9.26   | 1.65 | 0.38  |
| Anand | 37 | 61.50 | 67.5  | 127.7   | 38.55 | 1.33 | 12.00 | 10.59 | 13.67  | 22.49 | 304.55 | 8.38  | 0.33  | 2.64   | 1.85 | 0.405 |
| Anand | 38 | 66.00 | 72    | 117.325 | 41.60 | 1.00 | 17.06 | 12.47 | 14.995 | 30.83 | 463.40 | 10.93 | 0.55  | 0.245  | 2.01 | 0.48  |
| Anand | 39 | 64.00 | 71    | 96.45   | 43.79 | 1.50 | 12.00 | 10.98 | 13.94  | 13.67 | 193.65 | 11.07 | 0.52  | 2.66   | 2.21 | 0.545 |
| Anand | 40 | 65.50 | 71    | 154.75  | 67.94 | 1.17 | 16.50 | 10.01 | 13.155 | 34.75 | 458.67 | 12.86 | 0.27  | 0.115  | 2.12 | 0.68  |
| Anand | 41 | 62.00 | 68    | 130.975 | 34.71 | 1.83 | 14.13 | 8.67  | 9.76   | 26.75 | 264.60 | 11.76 | 0.8   | 0.48   | 1.94 | 0.5   |
| Anand | 42 | 68.50 | 75    | 146.05  | 58.43 | 1.17 | 10.20 | 9.57  | 13.065 | 23.84 | 311.73 | 13.58 | 0.52  | 0.13   | 1.87 | 0.635 |
| Anand | 43 | 60.50 | 67    | 128.65  | 51.75 | 1.00 | 16.08 | 10.62 | 12.94  | 24.28 | 314.08 | 10.72 | 0.5   | 0.21   | 3.16 | 0.755 |
| Anand | 44 | 55.50 | 62    | 125.3   | 52.48 | 1.50 | 13.95 | 10.48 | 12.875 | 23.50 | 302.83 | 14.76 | 0.55  | 1.17   | 1.67 | 0.545 |
| Anand | 45 | 56.50 | 63.5  | 141     | 52.76 | 1.00 | 12.34 | 9.45  | 11.995 | 19.92 | 238.70 | 13.10 | 0.61  | 0.145  | 2.00 | 0.5   |
| Anand | 46 | 59.00 | 67    | 117.475 | 51.36 | 1.33 | 15.27 | 8.81  | 10.405 | 22.66 | 237.43 | 13.44 | 0.3   | 1.34   | 1.90 | 0.485 |
| Anand | 47 | 62.50 | 68    | 143.9   | 56.01 | 1.33 | 15.00 | 9.00  | 12.66  | 29.84 | 376.29 | 13.83 | 0.31  | 0.275  | 2.17 | 0.47  |
| Anand | 48 | 72.00 | 76    | 149.55  | 72.06 | 1.50 | 15.99 | 14.08 | 13.535 | 24.84 | 335.58 | 14.22 | 0.635 | 0.22   | 2.03 | 0.51  |
| Anand | 49 | 67.00 | 73.5  | 172.05  | 78.97 | 1.67 | 15.00 | 13.84 | 12.47  | 29.50 | 369.27 | 12.45 | 0.475 | 0.23   | 2.92 | 0.73  |
| Anand | 50 | 65.00 | 72    | 144.7   | 64.40 | 1.83 | 13.50 | 8.63  | 11.675 | 29.33 | 341.61 | 13.81 | 0.455 | 13.84  | 1.36 | 0.305 |
| Anand | 51 | 64.50 | 70    | 104.90  | 40.77 | 1.33 | 12.09 | 9.47  | 10.63  | 25.16 | 269.38 | 15.34 | 0.46  | 4.29   | 1.72 | 0.45  |
| Anand | 52 | 71.00 | 78.50 | 113.80  | 49.64 | 1.17 | 12.08 | 12.21 | 14.17  | 29.83 | 421.54 | 15.31 | 2.32  | 3.34   | 2.12 | 0.535 |
| Anand | 53 | 64.50 | 71.00 | 112.75  | 32.79 | 1.50 | 14.52 | 9.88  | 13.00  | 24.50 | 318.00 | 16.77 | 1.62  | 2.19   | 1.92 | 0.705 |



|       |    |       |       |        |       |      |       |       |       |       |        |       |      |       |      |       |
|-------|----|-------|-------|--------|-------|------|-------|-------|-------|-------|--------|-------|------|-------|------|-------|
| Anand | 54 | 69.00 | 75.00 | 119.80 | 51.72 | 1.50 | 15.68 | 13.42 | 16.35 | 36.65 | 600.44 | 16.31 | 1.73 | 6.35  | 1.91 | 0.47  |
| Anand | 55 | 70.50 | 78.00 | 137.95 | 77.03 | 1.00 | 17.65 | 14.50 | 12.10 | 33.99 | 412.01 | 15.38 | 1.88 | 1.80  | 2.64 | 0.61  |
| Anand | 56 | 72.00 | 78.50 | 151.68 | 67.69 | 1.00 | 16.92 | 13.54 | 13.67 | 37.18 | 507.52 | 12.01 | 1.00 | 3.94  | 3.02 | 0.63  |
| Anand | 57 | 71.00 | 76.50 | 90.44  | 22.69 | 1.68 | 12.25 | 13.17 | 15.34 | 30.16 | 463.11 | 12.45 | 2.44 | 8.43  | 4.27 | 0.985 |
| Anand | 58 | 60.50 | 68.00 | 95.22  | 59.10 | 1.83 | 14.92 | 12.83 | 13.00 | 30.83 | 400.34 | 13.22 | 2.26 | 4.99  | 2.58 | 0.605 |
| Anand | 59 | 76.50 | 82.50 | 83.60  | 40.64 | 1.50 | 14.78 | 12.50 | 11.96 | 22.60 | 270.54 | 15.74 | 1.74 | 3.15  | 1.56 | 0.49  |
| Anand | 60 | 73.50 | 80.00 | 134.20 | 39.31 | 1.50 | 15.67 | 12.17 | 17.18 | 32.00 | 550.58 | 13.87 | 2.28 | 6.83  | 1.35 | 0.355 |
| Anand | 61 | 70.00 | 76.50 | 103.88 | 27.63 | 1.00 | 16.49 | 12.09 | 13.84 | 33.89 | 470.04 | 12.94 | 1.70 | 5.34  | 3.23 | 0.72  |
| Anand | 62 | 63.00 | 69.50 | 138.23 | 63.49 | 1.42 | 17.08 | 14.25 | 15.17 | 36.65 | 556.25 | 14.37 | 2.16 | 18.81 | 1.52 | 0.33  |
| Anand | 63 | 74.50 | 78.50 | 92.25  | 21.58 | 1.33 | 14.00 | 12.25 | 14.50 | 24.50 | 357.00 | 14.13 | 1.66 | 18.53 | 1.73 | 0.33  |
| Anand | 64 | 72.50 | 79.50 | 126.87 | 41.87 | 1.20 | 17.33 | 14.17 | 13.67 | 34.00 | 464.34 | 13.93 | 1.34 | 33.64 | 2.75 | 0.46  |
| Anand | 65 | 65.00 | 70.50 | 126.25 | 46.67 | 1.67 | 9.97  | 13.88 | 15.65 | 25.15 | 393.90 | 13.90 | 3.24 | 13.80 | 1.99 | 0.54  |
| Anand | 66 | 64.00 | 70.00 | 137.50 | 55.07 | 2.00 | 9.88  | 10.71 | 15.27 | 21.75 | 332.20 | 13.11 | 3.13 | 6.81  | 2.41 | 0.48  |
| Anand | 67 | 71.50 | 79.00 | 79.95  | 31.45 | 2.00 | 14.67 | 12.75 | 15.50 | 29.23 | 453.38 | 15.21 | 2.44 | 6.33  | 1.49 | 0.31  |
| Anand | 68 | 76.50 | 81.00 | 89.09  | 41.40 | 1.50 | 11.88 | 11.00 | 12.17 | 17.32 | 210.86 | 14.87 | 1.58 | 3.82  | 2.65 | 0.615 |
| Anand | 69 | 73.50 | 80.00 | 108.17 | 32.22 | 1.33 | 12.92 | 12.25 | 13.67 | 27.28 | 370.11 | 11.59 | 2.22 | 24.85 | 1.87 | 0.41  |
| Anand | 70 | 71.00 | 76.50 | 114.74 | 29.69 | 2.34 | 12.92 | 11.00 | 13.67 | 27.84 | 380.67 | 12.33 | 1.65 | 17.34 | 1.42 | 0.325 |
| Anand | 71 | 73.00 | 78.50 | 96.80  | 36.50 | 1.17 | 11.17 | 9.17  | 12.34 | 18.50 | 227.78 | 12.23 | 2.06 | 3.01  | 3.16 | 0.725 |
| Anand | 72 | 71.50 | 77.50 | 102.68 | 48.00 | 1.33 | 17.00 | 15.02 | 16.00 | 32.00 | 512.00 | 12.87 | 2.25 | 3.94  | 2.16 | 0.605 |
| Anand | 73 | 64.00 | 71.50 | 108.98 | 36.65 | 1.80 | 18.27 | 13.33 | 11.95 | 21.50 | 256.53 | 12.31 | 2.23 | 3.34  | 2.18 | 0.515 |
| Anand | 74 | 69.50 | 77.00 | 121.79 | 45.19 | 1.00 | 13.38 | 13.42 | 12.67 | 26.67 | 337.78 | 13.70 | 3.20 | 5.50  | 1.82 | 0.465 |
| Anand | 75 | 64.50 | 71.50 | 129.57 | 47.47 | 1.50 | 15.66 | 12.71 | 16.50 | 34.75 | 573.75 | 15.13 | 2.21 | 4.33  | 1.06 | 0.21  |
| Anand | 76 | 69.50 | 74.50 | 133.89 | 61.99 | 1.67 | 13.98 | 13.98 | 15.50 | 18.84 | 291.84 | 13.10 | 2.45 | 3.11  | 1.22 | 0.31  |
| Anand | 77 | 71.50 | 78.00 | 108.77 | 54.75 | 1.00 | 13.70 | 12.75 | 15.67 | 30.00 | 470.11 | 15.41 | 2.08 | 4.85  | 1.62 | 0.595 |
| Anand | 78 | 74.50 | 80.50 | 128.84 | 47.44 | 1.00 | 12.17 | 13.34 | 15.50 | 26.42 | 409.92 | 13.67 | 2.06 | 6.33  | 2.02 | 0.46  |
| Anand | 79 | 75.50 | 81.50 | 136.75 | 68.86 | 1.00 | 12.96 | 13.84 | 15.34 | 28.00 | 428.67 | 15.66 | 1.54 | 6.35  | 2.85 | 0.36  |
| Anand | 80 | 77.50 | 81.50 | 173.43 | 69.48 | 1.00 | 15.82 | 11.75 | 13.65 | 36.06 | 492.90 | 14.73 | 2.31 | 8.28  | 1.67 | 0.415 |
| Anand | 81 | 74.00 | 79.50 | 116.06 | 40.57 | 2.00 | 13.75 | 12.00 | 14.67 | 28.50 | 419.00 | 15.43 | 2.55 | 4.42  | 2.45 | 0.7   |

|        |    |       |       |         |        |      |       |        |        |       |         |       |       |        |      |       |
|--------|----|-------|-------|---------|--------|------|-------|--------|--------|-------|---------|-------|-------|--------|------|-------|
| Anand  | 82 | 74.00 | 82.00 | 88.81   | 29.76  | 1.50 | 10.25 | 9.67   | 13.00  | 19.92 | 256.34  | 15.01 | 3.27  | 5.86   | 3.16 | 0.745 |
| Anand  | 83 | 77.00 | 83.00 | 107.94  | 57.56  | 1.00 | 11.63 | 8.75   | 12.84  | 28.17 | 361.45  | 16.12 | 2.02  | 7.33   | 2.52 | 0.75  |
| Anand  | 84 | 73.00 | 78.00 | 101.91  | 35.27  | 1.00 | 11.34 | 11.33  | 14.00  | 22.33 | 312.67  | 14.80 | 2.07  | 3.44   | 1.72 | 0.5   |
| Anand  | 85 | 75.50 | 82.00 | 103.87  | 45.67  | 1.50 | 13.58 | 12.50  | 15.00  | 36.82 | 551.41  | 14.19 | 1.51  | 7.93   | 2.14 | 0.73  |
| Anand  | 86 | 78.50 | 85.00 | 108.41  | 45.69  | 1.00 | 12.08 | 11.00  | 13.00  | 22.00 | 286.56  | 14.27 | 1.13  | 9.74   | 1.23 | 0.325 |
| Anand  | 87 | 70.50 | 76.50 | 114.03  | 44.22  | 1.50 | 15.82 | 10.75  | 11.84  | 31.14 | 369.69  | 14.14 | 2.13  | 6.34   | 1.79 | 0.43  |
| Anand  | 88 | 78.50 | 85.50 | 91.93   | 21.08  | 1.00 | 16.87 | 11.25  | 13.50  | 32.14 | 434.07  | 13.80 | 2.57  | 14.79  | 2.21 | 0.59  |
| Anand  | 89 | 75.50 | 82.50 | 115.80  | 42.68  | 1.33 | 8.80  | 11.75  | 17.50  | 14.30 | 250.60  | 15.32 | 2.26  | 4.81   | 1.74 | 0.4   |
| Anand  | 90 | 73.00 | 79.50 | 105.94  | 23.11  | 2.00 | 12.17 | 11.08  | 12.82  | 25.67 | 329.14  | 14.43 | 2.15  | 14.95  | 2.65 | 0.68  |
| Anand  | 91 | 74.50 | 81.50 | 95.09   | 24.45  | 1.50 | 11.83 | 11.58  | 14.34  | 25.17 | 360.42  | 15.55 | 2.21  | 17.10  | 2.75 | 0.565 |
| Anand  | 92 | 73.50 | 78.50 | 141.15  | 36.57  | 1.33 | 12.44 | 11.25  | 12.84  | 26.59 | 340.81  | 13.62 | 2.03  | 5.98   | 2.40 | 0.6   |
| Anand  | 93 | 72.00 | 79.50 | 92.78   | 30.09  | 1.17 | 12.89 | 12.82  | 13.50  | 27.01 | 364.94  | 12.55 | 1.42  | 13.80  | 1.74 | 0.405 |
| Anand  | 94 | 72.50 | 80.00 | 110.55  | 42.06  | 1.00 | 14.01 | 12.78  | 14.50  | 28.00 | 405.50  | 14.10 | 2.57  | 9.86   | 2.57 | 0.64  |
| Anand  | 95 | 71.50 | 78.00 | 131.33  | 34.13  | 1.50 | 14.67 | 11.84  | 13.67  | 30.16 | 412.60  | 14.49 | 2.61  | 7.48   | 2.03 | 0.54  |
| Anand  | 96 | 74    | 78    | 131.775 | 58.57  | 1.33 | 13    | 14.625 | 15.665 | 29.5  | 461.335 | 14.89 | 2.355 | 7.89   | 2.22 | 0.715 |
| Godhra | 1  | 76.50 | 81.50 | 246.00  | 139.10 | 2.17 | 19.06 | 14.08  | 16.53  | 30.62 | 506.50  | 8.69  | 0.45  | 0.575  | 1.19 | 0.165 |
| Godhra | 2  | 73.50 | 79.00 | 137.65  | 77.92  | 1.17 | 14.81 | 12.03  | 16.74  | 21.30 | 355.86  | 6.72  | 0.45  | 1.295  | 1.58 | 0.29  |
| Godhra | 3  | 76.00 | 83.00 | 194.95  | 96.55  | 1.00 | 18.97 | 14.22  | 12.69  | 38.14 | 482.78  | 8.34  | 0.48  | 1.035  | 1.11 | 0.28  |
| Godhra | 4  | 74.00 | 81.00 | 198.65  | 107.80 | 1.50 | 13.90 | 14.50  | 17.52  | 29.17 | 511.62  | 8.46  | 0.52  | 0.24   | 1.32 | 0.18  |
| Godhra | 5  | 69.00 | 73.50 | 203.25  | 98.61  | 2.17 | 19.38 | 12.83  | 12.77  | 29.92 | 381.63  | 9.24  | 0.46  | 0.39   | 1.49 | 0.27  |
| Godhra | 6  | 68.00 | 73.00 | 163.03  | 100.04 | 1.17 | 12.63 | 13.35  | 14.72  | 22.78 | 334.98  | 9.82  | 0.28  | 0.93   | 1.13 | 0.21  |
| Godhra | 7  | 70.00 | 75.50 | 248.82  | 130.60 | 1.50 | 16.34 | 12.70  | 15.17  | 33.64 | 511.29  | 10.07 | 0.34  | 2.635  | 1.38 | 0.165 |
| Godhra | 8  | 69.50 | 76.00 | 138.33  | 62.32  | 1.83 | 11.08 | 9.95   | 12.53  | 20.20 | 253.63  | 8.78  | 0.41  | 1.72   | 2.00 | 0.22  |
| Godhra | 9  | 61.00 | 67.50 | 201.80  | 98.45  | 2.00 | 10.16 | 11.03  | 12.31  | 18.71 | 230.46  | 8.30  | 0.43  | 8.13   | 1.34 | 0.15  |
| Godhra | 10 | 67.00 | 72.50 | 127.13  | 48.32  | 1.00 | 9.84  | 9.74   | 16.99  | 24.18 | 410.01  | 11.06 | 0.43  | 13.155 | 1.10 | 0.175 |
| Godhra | 11 | 71.50 | 78.50 | 152.60  | 79.98  | 1.17 | 13.78 | 10.40  | 12.04  | 26.73 | 322.21  | 11.99 | 0.35  | 3.78   | 1.29 | 0.31  |
| Godhra | 12 | 68.00 | 74.00 | 181.00  | 101.03 | 1.33 | 13.51 | 9.49   | 13.96  | 29.39 | 409.86  | 11.10 | 0.25  | 8.415  | 1.31 | 0.3   |
| Godhra | 13 | 69.00 | 75.00 | 217.13  | 121.45 | 1.50 | 17.84 | 11.11  | 9.42   | 35.03 | 330.77  | 11.37 | 0.43  | 8.885  | 1.35 | 0.305 |

|        |    |       |       |        |        |      |       |       |       |       |        |       |      |       |      |       |
|--------|----|-------|-------|--------|--------|------|-------|-------|-------|-------|--------|-------|------|-------|------|-------|
| Godhra | 14 | 68.00 | 73.00 | 177.95 | 67.79  | 1.50 | 13.21 | 11.65 | 13.83 | 27.46 | 378.93 | 8.16  | 0.72 | 8.265 | 1.88 | 0.4   |
| Godhra | 15 | 69.00 | 76.00 | 154.00 | 78.65  | 1.50 | 15.08 | 10.44 | 13.44 | 25.95 | 349.11 | 10.29 | 0.71 | 6.245 | 1.59 | 0.31  |
| Godhra | 16 | 64.50 | 71.00 | 152.30 | 74.03  | 1.83 | 15.31 | 12.12 | 12.95 | 21.46 | 279.18 | 10.92 | 0.60 | 8.89  | 1.46 | 0.315 |
| Godhra | 17 | 73.50 | 80.00 | 157.30 | 88.62  | 1.50 | 17.30 | 12.28 | 15.48 | 26.06 | 403.70 | 9.03  | 0.57 | 1.405 | 1.99 | 0.57  |
| Godhra | 18 | 68.50 | 74.50 | 223.38 | 112.33 | 2.17 | 15.95 | 13.75 | 14.41 | 28.43 | 409.69 | 11.50 | 0.44 | 10.04 | 1.42 | 0.375 |
| Godhra | 19 | 70.50 | 77.00 | 149.55 | 83.93  | 1.17 | 17.50 | 14.60 | 13.63 | 30.88 | 420.41 | 11.03 | 0.48 | 4.9   | 1.15 | 0.31  |
| Godhra | 20 | 68.50 | 76.00 | 262.70 | 137.48 | 1.50 | 21.67 | 14.40 | 13.91 | 28.44 | 395.86 | 10.61 | 0.34 | 4.92  | 1.46 | 0.355 |
| Godhra | 21 | 71.50 | 78.00 | 133.80 | 75.56  | 1.67 | 14.50 | 13.10 | 16.76 | 33.15 | 556.38 | 10.96 | 0.65 | 6.165 | 1.14 | 0.21  |
| Godhra | 22 | 73.50 | 81.50 | 202.35 | 121.53 | 1.83 | 14.96 | 12.43 | 13.54 | 21.58 | 292.28 | 11.19 | 0.55 | 7.315 | 1.64 | 0.38  |
| Godhra | 23 | 69.00 | 76.00 | 203.32 | 116.67 | 1.67 | 17.13 | 12.95 | 16.14 | 38.45 | 620.87 | 11.05 | 0.61 | 3.505 | 1.65 | 0.335 |
| Godhra | 24 | 73.00 | 78.50 | 200.45 | 113.95 | 2.83 | 18.54 | 11.89 | 12.86 | 34.20 | 439.17 | 12.12 | 0.30 | 6.755 | 2.00 | 0.525 |
| Godhra | 25 | 70.50 | 78.00 | 200.13 | 127.42 | 1.84 | 17.27 | 12.45 | 15.44 | 31.09 | 479.80 | 12.00 | 0.35 | 8.1   | 1.79 | 0.32  |
| Godhra | 26 | 70.00 | 75.00 | 168.03 | 80.24  | 1.34 | 14.67 | 11.40 | 13.59 | 25.04 | 340.61 | 12.03 | 0.38 | 4.055 | 2.67 | 0.655 |
| Godhra | 27 | 75.00 | 82.00 | 192.53 | 111.70 | 1.17 | 14.19 | 12.35 | 13.38 | 17.55 | 234.87 | 10.61 | 0.43 | 4.59  | 1.56 | 0.32  |
| Godhra | 28 | 74.50 | 82.00 | 120.03 | 54.13  | 1.17 | 13.63 | 12.40 | 14.53 | 27.73 | 403.52 | 12.09 | 0.34 | 1.55  | 1.39 | 0.29  |
| Godhra | 29 | 66.00 | 74.00 | 178.68 | 86.49  | 1.00 | 16.00 | 13.34 | 14.74 | 33.57 | 493.11 | 7.76  | 0.34 | 10.52 | 1.71 | 0.355 |
| Godhra | 30 | 66.50 | 72.00 | 146.89 | 81.02  | 2.00 | 10.50 | 11.50 | 14.64 | 23.10 | 338.77 | 7.24  | 0.87 | 6.59  | 1.47 | 0.33  |
| Godhra | 31 | 62.50 | 70.00 | 105.12 | 50.05  | 2.17 | 13.83 | 13.28 | 14.34 | 29.74 | 426.54 | 8.42  | 0.07 | 0.795 | 1.70 | 0.36  |
| Godhra | 32 | 65.50 | 71.50 | 183.75 | 94.12  | 1.50 | 15.72 | 11.95 | 13.59 | 32.93 | 446.81 | 9.36  | 0.44 | 0.56  | 1.62 | 0.41  |
| Godhra | 33 | 70.50 | 77.00 | 87.63  | 31.97  | 1.17 | 11.13 | 10.78 | 11.50 | 19.90 | 230.09 | 11.13 | 0.43 | 4.795 | 1.66 | 0.435 |
| Godhra | 34 | 72.50 | 79.00 | 154.65 | 73.49  | 1.83 | 11.22 | 12.70 | 14.22 | 22.44 | 319.31 | 11.10 | 0.48 | 9.1   | 1.86 | 0.39  |
| Godhra | 35 | 73.00 | 79.50 | 160.48 | 71.15  | 1.50 | 11.50 | 8.55  | 8.34  | 11.50 | 96.08  | 10.54 | 0.64 | 6.34  | 2.59 | 0.645 |
| Godhra | 36 | 71.50 | 78.50 | 186.80 | 82.16  | 2.00 | 16.33 | 12.29 | 12.39 | 29.83 | 368.87 | 9.67  | 0.54 | 7.875 | 1.67 | 0.38  |
| Godhra | 37 | 62.50 | 67.50 | 207.92 | 85.88  | 1.50 | 16.11 | 13.54 | 14.50 | 24.52 | 356.06 | 10.05 | 0.38 | 1.34  | 1.86 | 0.425 |
| Godhra | 38 | 62.00 | 69.50 | 114.69 | 70.01  | 1.84 | 11.20 | 11.98 | 14.89 | 25.13 | 375.58 | 11.17 | 0.57 | 0.415 | 2.02 | 0.48  |
| Godhra | 39 | 61.00 | 66.00 | 185.82 | 93.52  | 1.83 | 14.50 | 14.54 | 17.22 | 26.10 | 448.95 | 12.90 | 0.54 | 1.165 | 2.24 | 0.545 |
| Godhra | 40 | 64.50 | 71.00 | 230.92 | 105.48 | 2.00 | 17.38 | 15.75 | 13.13 | 29.05 | 381.69 | 14.25 | 0.28 | 0.42  | 2.14 | 0.69  |
| Godhra | 41 | 60.00 | 65.50 | 172.13 | 86.85  | 2.00 | 18.74 | 15.19 | 17.14 | 39.90 | 684.16 | 13.01 | 0.82 | 0.745 | 1.99 | 0.51  |

|        |    |       |       |        |        |      |       |       |       |       |        |       |      |        |      |       |
|--------|----|-------|-------|--------|--------|------|-------|-------|-------|-------|--------|-------|------|--------|------|-------|
| Godhra | 42 | 63.50 | 71.00 | 115.60 | 49.13  | 1.33 | 15.00 | 11.58 | 17.64 | 30.54 | 541.98 | 15.01 | 0.55 | 0.32   | 1.92 | 0.64  |
| Godhra | 43 | 60.00 | 68.00 | 186.80 | 91.20  | 2.17 | 17.20 | 12.24 | 12.80 | 34.74 | 445.73 | 12.08 | 0.53 | 0.205  | 3.16 | 0.735 |
| Godhra | 44 | 57.50 | 64.50 | 203.82 | 96.97  | 1.67 | 15.89 | 15.08 | 14.53 | 25.57 | 371.94 | 14.02 | 0.57 | 1.325  | 1.67 | 0.565 |
| Godhra | 45 | 57.00 | 64.50 | 209.53 | 95.03  | 1.50 | 20.50 | 16.06 | 14.15 | 35.62 | 504.19 | 11.89 | 0.61 | 0.98   | 2.07 | 0.505 |
| Godhra | 46 | 63.50 | 71.00 | 151.60 | 82.04  | 2.17 | 15.92 | 11.50 | 12.18 | 18.75 | 229.29 | 14.55 | 0.34 | 1.285  | 1.95 | 0.495 |
| Godhra | 47 | 58.50 | 66.50 | 183.63 | 99.80  | 1.33 | 17.98 | 15.31 | 13.17 | 32.19 | 424.21 | 10.77 | 0.34 | 0.96   | 2.15 | 0.48  |
| Godhra | 48 | 71.50 | 78.50 | 120.82 | 60.30  | 1.50 | 13.00 | 9.68  | 14.97 | 21.06 | 316.11 | 15.78 | 0.63 | 0.49   | 2.06 | 0.52  |
| Godhra | 49 | 69.50 | 76.00 | 131.47 | 67.80  | 1.00 | 14.75 | 14.18 | 16.56 | 25.43 | 421.23 | 13.39 | 0.49 | 0.53   | 3.01 | 0.735 |
| Godhra | 50 | 63.00 | 70.50 | 187.48 | 74.47  | 1.84 | 11.09 | 14.31 | 22.18 | 22.11 | 489.51 | 15.98 | 0.48 | 10.355 | 1.36 | 0.32  |
| Godhra | 51 | 62.50 | 68.00 | 119.98 | 66.82  | 1.17 | 11.50 | 8.25  | 11.79 | 17.78 | 209.31 | 15.07 | 0.46 | 6.25   | 1.74 | 0.46  |
| Godhra | 52 | 67.50 | 75.00 | 154.49 | 65.49  | 1.33 | 14.00 | 11.40 | 12.56 | 24.25 | 289.83 | 15.30 | 2.36 | 2.89   | 2.16 | 0.55  |
| Godhra | 53 | 59.50 | 65.50 | 197.47 | 82.09  | 1.50 | 19.00 | 12.57 | 13.75 | 33.63 | 462.46 | 16.72 | 1.64 | 2.79   | 2.73 | 0.7   |
| Godhra | 54 | 65.00 | 72.50 | 142.99 | 77.95  | 1.00 | 15.40 | 12.42 | 16.13 | 29.21 | 471.80 | 17.22 | 1.78 | 6.78   | 1.93 | 0.475 |
| Godhra | 55 | 66.00 | 72.00 | 180.99 | 70.95  | 1.29 | 17.09 | 14.25 | 12.90 | 30.09 | 387.54 | 15.63 | 1.97 | 3.73   | 2.68 | 0.615 |
| Godhra | 56 | 70.00 | 76.00 | 99.14  | 49.31  | 1.33 | 12.45 | 9.35  | 11.57 | 22.13 | 255.00 | 12.08 | 1.10 | 5.11   | 3.05 | 0.65  |
| Godhra | 57 | 67.00 | 74.50 | 207.78 | 83.28  | 1.67 | 16.20 | 10.41 | 13.46 | 30.83 | 415.46 | 12.85 | 2.55 | 9.00   | 4.47 | 0.98  |
| Godhra | 58 | 61.00 | 68.50 | 185.50 | 65.94  | 1.67 | 18.20 | 13.40 | 14.57 | 35.87 | 513.18 | 13.35 | 1.96 | 4.99   | 2.80 | 0.52  |
| Godhra | 59 | 76.50 | 83.00 | 147.00 | 86.33  | 1.00 | 13.48 | 10.60 | 12.47 | 22.28 | 278.45 | 16.47 | 1.66 | 3.15   | 1.72 | 0.46  |
| Godhra | 60 | 73.00 | 80.50 | 209.17 | 103.45 | 1.15 | 17.90 | 12.90 | 12.14 | 32.54 | 388.18 | 13.83 | 1.21 | 7.16   | 1.32 | 0.31  |
| Godhra | 61 | 68.50 | 74.00 | 172.97 | 112.92 | 1.49 | 18.09 | 12.24 | 12.72 | 32.31 | 408.74 | 12.56 | 1.70 | 6.81   | 3.29 | 0.77  |
| Godhra | 62 | 64.50 | 71.00 | 190.00 | 87.83  | 1.33 | 19.62 | 13.13 | 13.51 | 36.61 | 491.02 | 14.14 | 2.11 | 15.59  | 1.58 | 0.33  |
| Godhra | 63 | 71.00 | 76.50 | 131.40 | 61.93  | 1.50 | 16.10 | 9.97  | 12.62 | 32.97 | 409.04 | 14.22 | 1.63 | 19.06  | 1.49 | 0.32  |
| Godhra | 64 | 71.00 | 78.00 | 197.95 | 105.39 | 1.17 | 19.08 | 13.65 | 14.04 | 41.33 | 577.50 | 13.77 | 1.18 | 35.72  | 2.28 | 0.455 |
| Godhra | 65 | 62.50 | 69.00 | 188.64 | 110.66 | 1.00 | 10.00 | 12.54 | 12.79 | 17.46 | 223.78 | 14.00 | 3.54 | 13.84  | 2.00 | 0.55  |
| Godhra | 66 | 61.50 | 68.50 | 89.83  | 50.83  | 1.00 | 7.45  | 10.02 | 10.51 | 23.03 | 242.88 | 13.41 | 3.34 | 8.87   | 2.29 | 0.475 |
| Godhra | 67 | 69.50 | 76.00 | 201.02 | 106.16 | 1.17 | 16.45 | 13.24 | 13.94 | 39.02 | 544.60 | 14.70 | 2.53 | 7.77   | 1.44 | 0.33  |
| Godhra | 68 | 74.50 | 80.50 | 156.68 | 65.60  | 1.12 | 16.19 | 13.25 | 15.41 | 29.00 | 441.08 | 14.93 | 1.62 | 2.46   | 2.91 | 0.63  |
| Godhra | 69 | 70.00 | 77.00 | 226.50 | 116.07 | 1.50 | 18.12 | 14.23 | 14.44 | 36.03 | 519.98 | 11.99 | 2.25 | 27.11  | 1.96 | 0.405 |

|        |    |       |       |         |         |      |        |        |       |        |        |        |       |        |      |       |
|--------|----|-------|-------|---------|---------|------|--------|--------|-------|--------|--------|--------|-------|--------|------|-------|
| Godhra | 70 | 70.00 | 76.00 | 140.32  | 73.66   | 2.00 | 12.08  | 10.94  | 12.76 | 28.33  | 345.23 | 12.05  | 1.91  | 16.82  | 1.64 | 0.365 |
| Godhra | 71 | 68.50 | 75.00 | 101.99  | 43.47   | 1.50 | 11.30  | 9.60   | 11.87 | 23.66  | 213.97 | 12.52  | 2.20  | 1.94   | 3.22 | 0.765 |
| Godhra | 72 | 69.00 | 76.00 | 198.59  | 104.99  | 1.39 | 19.18  | 12.65  | 13.95 | 34.96  | 486.69 | 13.27  | 2.05  | 2.81   | 2.17 | 0.49  |
| Godhra | 73 | 61.00 | 67.00 | 162.30  | 66.66   | 1.50 | 11.73  | 13.87  | 22.55 | 21.08  | 476.31 | 12.63  | 2.36  | 3.32   | 2.15 | 0.53  |
| Godhra | 74 | 67.00 | 74.00 | 161.25  | 65.49   | 1.33 | 14.94  | 13.47  | 13.83 | 27.61  | 381.02 | 14.17  | 3.18  | 6.33   | 1.89 | 0.495 |
| Godhra | 75 | 62.50 | 69.00 | 194.47  | 108.65  | 1.33 | 15.23  | 15.10  | 17.24 | 30.95  | 534.20 | 15.08  | 2.25  | 8.19   | 1.07 | 0.21  |
| Godhra | 76 | 70.00 | 78.00 | 150.45  | 86.33   | 1.17 | 12.80  | 12.70  | 15.17 | 26.45  | 377.93 | 12.68  | 2.43  | 2.19   | 1.26 | 0.31  |
| Godhra | 77 | 71.00 | 76.50 | 182.51  | 113.68  | 1.67 | 16.63  | 13.00  | 14.00 | 33.38  | 467.28 | 15.30  | 2.30  | 7.00   | 1.65 | 0.4   |
| Godhra | 78 | 70.00 | 77.00 | 161.49  | 69.65   | 1.63 | 15.64  | 13.94  | 12.06 | 22.09  | 266.24 | 14.00  | 2.28  | 4.15   | 2.03 | 0.455 |
| Godhra | 79 | 71.00 | 78.00 | 151.74  | 77.66   | 1.50 | 15.07  | 11.77  | 16.06 | 35.59  | 590.93 | 15.44  | 1.56  | 4.52   | 2.84 | 0.69  |
| Godhra | 80 | 75.00 | 80.50 | 174.47  | 85.49   | 1.82 | 11.53  | 10.73  | 12.32 | 18.83  | 224.19 | 14.73  | 2.33  | 9.56   | 1.61 | 0.405 |
| Godhra | 81 | 70.00 | 77.00 | 181.25  | 95.62   | 1.67 | 13.13  | 12.54  | 14.54 | 21.99  | 319.65 | 14.74  | 2.52  | 4.95   | 2.41 | 0.705 |
| Godhra | 82 | 69.50 | 77.00 | 159.62  | 87.85   | 1.17 | 14.55  | 13.14  | 16.82 | 29.72  | 480.38 | 15.08  | 3.23  | 5.33   | 3.03 | 0.765 |
| Godhra | 83 | 72.50 | 79.00 | 97.68   | 39.30   | 1.50 | 13.90  | 13.00  | 24.92 | 22.65  | 587.62 | 15.36  | 1.92  | 9.71   | 2.41 | 0.75  |
| Godhra | 84 | 72.50 | 79.00 | 129.12  | 54.33   | 1.00 | 13.32  | 13.80  | 15.26 | 26.17  | 399.65 | 15.13  | 2.01  | 2.35   | 1.76 | 0.495 |
| Godhra | 85 | 72.00 | 76.50 | 179.80  | 89.01   | 1.15 | 22.24  | 14.95  | 15.98 | 42.17  | 672.92 | 14.20  | 1.46  | 9.70   | 2.14 | 0.735 |
| Godhra | 86 | 75.50 | 81.50 | 123.10  | 30.56   | 1.58 | 9.30   | 7.55   | 11.19 | 19.47  | 216.53 | 13.59  | 1.04  | 8.87   | 1.31 | 0.315 |
| Godhra | 87 | 64.00 | 71.50 | 153.33  | 69.08   | 1.78 | 15.98  | 11.49  | 11.81 | 29.00  | 342.72 | 12.96  | 2.34  | 3.83   | 1.74 | 0.43  |
| Godhra | 88 | 74.50 | 82.00 | 202.49  | 98.65   | 1.17 | 13.78  | 11.83  | 20.70 | 24.95  | 516.67 | 13.08  | 2.78  | 15.19  | 2.37 | 0.57  |
| Godhra | 89 | 73.00 | 78.00 | 113.33  | 63.77   | 1.15 | 13.30  | 9.95   | 11.48 | 23.75  | 273.32 | 15.36  | 2.24  | 2.34   | 1.78 | 0.405 |
| Godhra | 90 | 71.50 | 78.00 | 96.35   | 40.14   | 1.50 | 12.30  | 11.50  | 12.55 | 27.81  | 349.86 | 13.99  | 2.17  | 16.42  | 2.68 | 0.62  |
| Godhra | 91 | 73.00 | 78.50 | 98.62   | 41.78   | 1.30 | 12.92  | 12.43  | 13.99 | 23.58  | 328.29 | 14.98  | 2.26  | 19.92  | 2.58 | 0.54  |
| Godhra | 92 | 72.00 | 77.50 | 214.28  | 118.02  | 1.10 | 18.25  | 14.54  | 14.47 | 26.80  | 387.15 | 14.39  | 2.10  | 3.33   | 2.38 | 0.6   |
| Godhra | 93 | 72.00 | 78.50 | 170.30  | 93.18   | 1.15 | 18.82  | 14.06  | 13.42 | 28.91  | 387.89 | 12.95  | 1.48  | 12.20  | 1.74 | 0.425 |
| Godhra | 94 | 73.50 | 79.00 | 167.80  | 102.13  | 1.17 | 17.25  | 14.23  | 13.67 | 32.55  | 445.27 | 13.00  | 2.79  | 12.12  | 2.77 | 0.645 |
| Godhra | 95 | 68.50 | 74.00 | 168.08  | 57.00   | 1.00 | 18.42  | 12.70  | 13.66 | 36.15  | 493.96 | 14.86  | 2.29  | 8.85   | 2.13 | 0.54  |
| Godhra | 96 | 71    | 76    | 185.025 | 100.165 | 1.15 | 14.735 | 14.575 | 13.75 | 30.625 | 421.25 | 15.325 | 1.865 | 10.525 | 2.69 | 0.71  |

**Table S5.** Nei genetic distance matrix between studied maize lines.

*Please see the excel sheet due to large sized table*

**Table S6.** The Evanno table output from STRUCTURE HARVESTER.

| K  | Replications | Mean<br>LnP(K) | St dev<br>LnP (K) | Ln' (K) | Ln''(K) | ΔK     |
|----|--------------|----------------|-------------------|---------|---------|--------|
| 2  | 5            | -7191.00       | 1.20              | -       | -       |        |
| 3  | 5            | -6862.26       | <b>1.16</b>       | 328.74  | 121.64  | 104.19 |
| 4  | 5            | -6655.16       | 1.69              | 207.10  | 11.56   | 6.81   |
| 5  | 5            | -6459.62       | 1.18              | 195.54  | 79.42   | 66.83  |
| 6  | 5            | -6343.50       | 20.58             | 116.12  | 31.74   | 1.54   |
| 7  | 5            | -6195.64       | 5.05              | 147.86  | 58.68   | 11.61  |
| 8  | 5            | -6106.46       | 32.24             | 89.18   | 60.72   | 1.88   |
| 9  | 5            | -5956.56       | 13.83             | 149.90  | 50.48   | 3.6    |
| 10 | 5            | -5857.14       | 11.83             | 99.42   | -       | -      |

**Table S7.** Q table derived from STRUCTURE analysis.

| Sr No. | Name of Genotype | I            | II           | II    | Inferred sub-population | Inferred cluster through Nei's distance |
|--------|------------------|--------------|--------------|-------|-------------------------|-----------------------------------------|
| 1      | I-07-14-1-2      | 0.149        | <b>0.845</b> | 0.007 | II                      | B1                                      |
| 2      | I-07-28-3-2      | 0.285        | <b>0.708</b> | 0.007 | Admixture               | B2                                      |
| 3      | I-07-29-1-3      | 0.017        | <b>0.970</b> | 0.013 | II                      | B1                                      |
| 4      | I-07-66-1-2      | 0.010        | <b>0.979</b> | 0.011 | II                      | B1                                      |
| 5      | I-07-66-2-3      | 0.027        | <b>0.965</b> | 0.008 | II                      | B1                                      |
| 6      | I-07-66-3-2      | 0.030        | <b>0.963</b> | 0.007 | II                      | B1                                      |
| 7      | I-07-66-4-1      | 0.171        | <b>0.798</b> | 0.032 | Admixture               | B1                                      |
| 8      | I-07-56-4-3      | 0.084        | <b>0.909</b> | 0.007 | II                      | B1                                      |
| 9      | I-077-59-5       | 0.089        | <b>0.901</b> | 0.01  | II                      | B1                                      |
| 10     | I-07-60-4-3      | 0.008        | <b>0.767</b> | 0.225 | Admixture               | B1                                      |
| 11     | I-07-65-44-4     | 0.010        | <b>0.969</b> | 0.021 | II                      | C                                       |
| 12     | I-07-6-4-4       | 0.005        | <b>0.987</b> | 0.008 | II                      | C                                       |
| 13     | I-07-6-4-5       | 0.269        | <b>0.718</b> | 0.013 | Admixture               | B1                                      |
| 14     | I-07-9-5         | 0.229        | <b>0.742</b> | 0.029 | Admixture               | B2                                      |
| 15     | I-07-13-1-3      | 0.151        | <b>0.844</b> | 0.005 | II                      | A2                                      |
| 16     | IL-14-28         | 0.055        | <b>0.930</b> | 0.015 | II                      | B1                                      |
| 17     | IL-14-48         | 0.012        | <b>0.878</b> | 0.111 | II                      | B1                                      |
| 18     | IL-14-60         | 0.020        | <b>0.971</b> | 0.009 | II                      | B1                                      |
| 19     | IL-17-28         | 0.008        | <b>0.969</b> | 0.023 | II                      | B1                                      |
| 20     | IL-17-32         | 0.004        | <b>0.987</b> | 0.008 | II                      | B1                                      |
| 21     | IL-17-34         | 0.028        | <b>0.966</b> | 0.006 | II                      | B1                                      |
| 22     | IL-17-44         | 0.008        | <b>0.967</b> | 0.025 | II                      | B1                                      |
| 23     | GYL-10           | 0.005        | <b>0.985</b> | 0.01  | II                      | B1                                      |
| 24     | PFSR5-3-5        | 0.009        | <b>0.983</b> | 0.007 | II                      | B1                                      |
| 25     | IL-15-39         | 0.008        | <b>0.986</b> | 0.007 | II                      | B1                                      |
| 26     | IL-15-11         | 0.022        | <b>0.851</b> | 0.127 | II                      | B1                                      |
| 27     | IGI-1101         | <b>0.987</b> | 0.007        | 0.006 | I                       | B1                                      |
| 28     | IGI-1103         | <b>0.947</b> | 0.043        | 0.01  | I                       | A2                                      |
| 29     | GYL-2            | <b>0.987</b> | 0.007        | 0.006 | I                       | A2                                      |
| 30     | CML-307          | <b>0.984</b> | 0.008        | 0.008 | I                       | A2                                      |
| 31     | IGI-1102         | <b>0.967</b> | 0.012        | 0.02  | I                       | A2                                      |
| 32     | IGI-1104         | <b>0.975</b> | 0.021        | 0.005 | I                       | A2                                      |
| 33     | LTP-1-1          | <b>0.986</b> | 0.008        | 0.006 | I                       | A2                                      |
| 34     | LM-B-2           | <b>0.917</b> | 0.007        | 0.076 | I                       | A2                                      |
| 35     | LM-5             | <b>0.955</b> | 0.021        | 0.024 | I                       | A2                                      |
| 36     | H07R-1-3         | <b>0.699</b> | 0.205        | 0.096 | Admixture               | A2                                      |
| 37     | GWQPM-5-3        | 0.274        | <b>0.718</b> | 0.007 | Admixture               | B1                                      |
| 38     | GWQPM-11         | 0.475        | <b>0.519</b> | 0.006 | Admixture               | B2                                      |
| 39     | GWQPM-17-2       | 0.256        | <b>0.724</b> | 0.02  | Admixture               | B2                                      |

|    |               |              |              |              |           |    |
|----|---------------|--------------|--------------|--------------|-----------|----|
| 40 | GWQPM-22-5    | 0.207        | <b>0.715</b> | 0.079        | Admixture | B1 |
| 41 | GWQPM-26-1    | 0.448        | <b>0.507</b> | 0.045        | Admixture | B2 |
| 42 | GWQPM-26-3    | 0.012        | <b>0.788</b> | 0.200        | Admixture | B2 |
| 43 | GWQPM-40-3    | 0.011        | <b>0.967</b> | 0.023        | II        | B1 |
| 44 | GWQPM-40-5    | 0.034        | <b>0.935</b> | 0.031        | II        | B1 |
| 45 | GWQPM-46-2    | 0.112        | <b>0.813</b> | 0.075        | II        | B1 |
| 46 | GWQPM-47-1    | 0.119        | <b>0.850</b> | 0.031        | II        | B2 |
| 47 | GWQPM-55-2    | 0.008        | <b>0.987</b> | 0.005        | II        | B2 |
| 48 | GWQPM-67-2    | 0.077        | <b>0.885</b> | 0.038        | II        | B1 |
| 49 | GWQPM-68-4    | 0.055        | <b>0.842</b> | 0.102        | II        | B2 |
| 50 | I-07-54-3-2   | 0.01         | <b>0.941</b> | 0.048        | II        | B1 |
| 51 | I-07-7-3-2    | <b>0.981</b> | 0.015        | 0.004        | I         | A2 |
| 52 | I-07-62-42-2  | 0.016        | <b>0.949</b> | 0.035        | II        | C  |
| 53 | 1820161/20-5  | 0.024        | <b>0.952</b> | 0.024        | II        | C  |
| 54 | 1820164/20    | 0.033        | <b>0.905</b> | 0.062        | II        | C  |
| 55 | 1820168/T1    | 0.009        | <b>0.975</b> | 0.016        | II        | C  |
| 56 | 1820213/9-20  | 0.005        | <b>0.758</b> | 0.237        | Admixture | C  |
| 57 | 1820215/C1-20 | 0.024        | <b>0.919</b> | 0.057        | II        | C  |
| 58 | 1820228/T2    | 0.009        | <b>0.925</b> | 0.065        | II        | C  |
| 59 | 11820211/T2   | 0.015        | <b>0.868</b> | 0.116        | II        | B2 |
| 60 | 1820211/T1    | <b>0.961</b> | 0.019        | 0.019        | I         | B2 |
| 61 | 1820200/C1-20 | <b>0.912</b> | 0.008        | 0.08         | I         | A2 |
| 62 | 1820198/C1-20 | <b>0.748</b> | 0.026        | 0.225        | Admixture | A2 |
| 63 | 1820197/T2    | <b>0.985</b> | 0.005        | 0.009        | I         | A2 |
| 64 | 1820197/T1    | <b>0.984</b> | 0.005        | 0.011        | I         | A2 |
| 65 | 1820167/C4-20 | <b>0.887</b> | 0.094        | 0.019        | I         | A2 |
| 66 | 1820194/T1    | <b>0.962</b> | 0.005        | 0.033        | I         | A2 |
| 67 | 1820192/4-20  | <b>0.990</b> | 0.003        | 0.007        | I         | A2 |
| 68 | 1820229/T2    | 0.403        | 0.009        | <b>0.588</b> | Admixture | A2 |
| 69 | I-07-33-04    | <b>0.776</b> | 0.014        | 0.210        | Admixture | A2 |
| 70 | I-07-34-3-1   | 0.311        | 0.174        | <b>0.515</b> | Admixture | A1 |
| 71 | I-07-36-1-4   | 0.293        | 0.013        | <b>0.694</b> | Admixture | A1 |
| 72 | I-07-36-2     | 0.162        | 0.013        | <b>0.825</b> | III       | A1 |
| 73 | I-07-37-6-1   | 0.017        | 0.005        | <b>0.977</b> | III       | A1 |
| 74 | I-07-40-4-2   | 0.015        | 0.014        | <b>0.972</b> | III       | A1 |
| 75 | I-07-62-22-5  | 0.011        | 0.003        | <b>0.985</b> | III       | A1 |
| 76 | 1820162/T3    | 0.047        | 0.051        | <b>0.902</b> | III       | A1 |
| 77 | 1820166/T2    | 0.006        | 0.004        | <b>0.989</b> | III       | A1 |
| 78 | 1820162/T2    | 0.006        | 0.007        | <b>0.987</b> | III       | A1 |
| 79 | 1820162/T1    | 0.009        | 0.125        | <b>0.867</b> | III       | A1 |
| 80 | 1820212/T2    | 0.023        | 0.078        | <b>0.899</b> | III       | A1 |
| 81 | 1820214/C1-20 | 0.005        | 0.016        | <b>0.979</b> | III       | A1 |
| 82 | 1820228/T1    | 0.004        | 0.004        | <b>0.992</b> | III       | A1 |
| 83 | 1820229/T1    | 0.007        | 0.008        | <b>0.985</b> | III       | A1 |

---
